# Supplementary material for: Assessing the efficiency of water-soluble organic compound biodegradation in clouds under various environmental conditions
Source: Royal Society of Chemistry journal article supplement (doi:10.1039/d2ea00153e), 2023-01-01
Supplement: d2ea00153e2.pdf [file d2ea00153e2.pdf]

## C1 compounds

| Reactions                                                                                                                |        | $k_{298}$<br>( $M^{-n+1} s^{-1}$ ) | Ea/R<br>(K) | References             | Notes                                  |
|--------------------------------------------------------------------------------------------------------------------------|--------|------------------------------------|-------------|------------------------|----------------------------------------|
| <b>Oxidation of HMHP - HydroxyMethyl HydroPeroxide</b>                                                                   |        |                                    |             |                        |                                        |
| $CH_2(OOH)(OH) + h\nu \rightarrow CHO(OH) + HO^\bullet + HO_2^\bullet - O_2$                                             | R(208) | Calculated                         |             |                        | = J( $H_2O_2$ )                        |
| Pathway 1: $CH_2(OOH)(OH) + HO^\bullet \rightarrow CH_2(OH)(OO^\bullet) + H_2O$                                          |        | $5.0 \cdot 10^8$                   |             |                        | BR: 80% - 1                            |
| Pathway 2: $CH_2(OOH)(OH) + HO^\bullet \rightarrow C^\bullet H(OOH)(OH) + H_2O$                                          |        | $1.3 \cdot 10^8$                   |             |                        | BR: 20% - 1                            |
| $C^\bullet H(OOH)(OH) + O_2 \rightarrow CH(OOH)(OH)(OO^\bullet)$                                                         |        | $2.0 \cdot 10^9$                   |             |                        | 2                                      |
| $CH_2(OOH)(OH) + HO^\bullet \rightarrow 0.80 CH_2(OH)(OO^\bullet) + 0.20 CH(OOH)(OH)(OO^\bullet) + H_2O - 0.20 O_2$      | R(209) | $6.3 \cdot 10^8$                   |             |                        | = k( $CH_3(OOH) + HO^\bullet$ ) - 1    |
| Pathway 1: $CH_2(OOH)(OH) + NO_3^\bullet \rightarrow CH_2(OH)(OO^\bullet) + NO_3^- + H^+$                                |        |                                    |             |                        | BR: 80%                                |
| Pathway 2: $CH_2(OOH)(OH) + NO_3^\bullet \rightarrow C^\bullet H(OOH)(OH) + NO_3^- + H^+$                                |        |                                    |             |                        | BR: 20%                                |
| $C^\bullet H(OOH)(OH) + O_2 \rightarrow CH(OOH)(OH)(OO^\bullet)$                                                         |        | $2.0 \cdot 10^9$                   |             |                        | 2                                      |
| $CH_2(OOH)(OH) + NO_3^\bullet \rightarrow 0.80 CH_2(OH)(OO^\bullet) + 0.20 CH(OOH)(OH)(OO^\bullet) + NO_3^- + H^+$       | R(210) | $4.9 \cdot 10^6$                   | 2000        |                        | = k( $H_2O_2 + NO_3^\bullet$ ) - 3     |
| Pathway 1: $CH_2(OOH)(OH) + CO_3^{\bullet-} \rightarrow CH_2(OH)(OO^\bullet) + HCO_3^-$                                  |        |                                    |             |                        | BR: 80%                                |
| Pathway 2: $CH_2(OOH)(OH) + CO_3^{\bullet-} \rightarrow C^\bullet H(OOH)(OH) + HCO_3^-$                                  |        |                                    |             |                        | BR: 20%                                |
| $C^\bullet H(OOH)(OH) + O_2 \rightarrow CH(OOH)(OH)(OO^\bullet)$                                                         |        | $2.0 \cdot 10^9$                   |             |                        | 2                                      |
| $CH_2(OOH)(OH) + CO_3^{\bullet-} \rightarrow 0.80 CH_2(OH)(OO^\bullet) + 0.20 CH(OOH)(OH)(OO^\bullet) + HCO_3^-$         | R(211) | $4.3 \cdot 10^5$                   |             |                        | = k( $H_2O_2 + CO_3^{\bullet-}$ ) - 3  |
| Pathway 1: $CH_2(OOH)(OH) + Cl_2^\bullet \rightarrow CH_2(OH)(OO^\bullet) + 2 Cl^- + H^+$                                |        |                                    |             |                        | BR: 80%                                |
| Pathway 2: $CH_2(OOH)(OH) + Cl_2^\bullet \rightarrow C^\bullet H(OOH)(OH) + 2 Cl^- + H^+$                                |        |                                    |             |                        | BR: 20%                                |
| $C^\bullet H(OOH)(OH) + O_2 \rightarrow CH(OOH)(OH)(OO^\bullet)$                                                         |        | $2.0 \cdot 10^9$                   |             |                        | 2                                      |
| $CH_2(OOH)(OH) + Cl_2^\bullet \rightarrow 0.80 CH_2(OH)(OO^\bullet) + 0.20 CH(OOH)(OH)(OO^\bullet) + 2 Cl^- + H^+$       | R(212) | $6.2 \cdot 10^6$                   |             |                        | = k( $H_2O_2 + Cl_2^\bullet$ ) - 3     |
| Pathway 1: $CH_2(OOH)(OH) + Cl^\bullet \rightarrow CH_2(OH)(OO^\bullet) + Cl^- + H^+$                                    |        |                                    |             |                        | BR: 80%                                |
| Pathway 2: $CH_2(OOH)(OH) + Cl^\bullet \rightarrow C^\bullet H(OOH)(OH) + Cl^- + H^+$                                    |        |                                    |             |                        | BR: 20%                                |
| $C^\bullet H(OOH)(OH) + O_2 \rightarrow CH(OOH)(OH)(OO^\bullet)$                                                         |        | $2.0 \cdot 10^9$                   |             |                        | 2                                      |
| $CH_2(OOH)(OH) + Cl^\bullet \rightarrow 0.80 CH_2(OH)(OO^\bullet) + 0.20 CH(OOH)(OH)(OO^\bullet) + Cl^- + H^+$           | R(213) | $2.0 \cdot 10^9$                   |             |                        | = k( $H_2O_2 + Cl^\bullet$ ) - 3       |
| Pathway 1: $CH_2(OOH)(OH) + SO_4^{\bullet-} \rightarrow CH_2(OH)(OO^\bullet) + SO_4^{2-} + H^+$                          |        |                                    |             |                        | BR: 80%                                |
| Pathway 2: $CH_2(OOH)(OH) + SO_4^{\bullet-} \rightarrow C^\bullet H(OOH)(OH) + SO_4^{2-} + H^+$                          |        |                                    |             |                        | BR: 20%                                |
| $C^\bullet H(OOH)(OH) + O_2 \rightarrow CH(OOH)(OH)(OO^\bullet)$                                                         |        | $2.0 \cdot 10^9$                   |             |                        | 2                                      |
| $CH_2(OOH)(OH) + SO_4^{\bullet-} \rightarrow 0.80 CH_2(OH)(OO^\bullet) + 0.20 CH(OOH)(OH)(OO^\bullet) + SO_4^{2-} + H^+$ | R(214) | $1.2 \cdot 10^7$                   |             |                        | = k( $H_2O_2 + SO_4^{\bullet-}$ ) - 3  |
| $CH_2(OOH)(OH) + Fe^{2+} \rightarrow Fe^{3+} + CHO(OH) + HO_2^\bullet + OH^- - O_2$                                      | R(215) | $1.6 \cdot 10^1$                   |             |                        | = k( $CH_3(OOH) + Fe^{2+}$ )           |
| $CH_2(OH)(OO^\bullet) \rightarrow CH_2O + HO_2^\bullet$                                                                  | R(216) | $1.0 \cdot 10^1$                   |             |                        | 4                                      |
| $CH_2(OH)(OO^\bullet) + OH^- \rightarrow CH_2(O)(OO^\bullet) + H_2O$                                                     |        | $2.1 \cdot 10^{10}$                | 7200        | Neta et al., 1990      | 5                                      |
| $CH_2(O)(OO^\bullet) \rightarrow CH_2O + O_2^\bullet$                                                                    |        |                                    |             |                        |                                        |
| $CH_2(OH)(OO^\bullet) + OH^- \rightarrow CH_2O + O_2^\bullet + H_2O$                                                     | R(217) | $2.1 \cdot 10^{10}$                | 7200        | Neta et al., 1990      |                                        |
| $CH_2(OH)(OO^\bullet) + HO_2^\bullet \rightarrow CH_2(OOH)(OH) + O_2$                                                    | R(218) | $8.3 \cdot 10^5$                   | 2700        |                        | = k( $HO_2^\bullet + HO_2^\bullet$ )   |
| $CH_2(OH)(OO^\bullet) + O_2^\bullet \rightarrow CH_2(OOH)(OH) + O_2 + OH^- - H_2O$                                       | R(219) | $9.6 \cdot 10^7$                   | 910         |                        | = k( $HO_2^\bullet + O_2^\bullet$ )    |
| $2 CH_2(OH)(OO^\bullet) \rightarrow 2 CHO(OH) + H_2O_2$                                                                  | R(220) | $7.4 \cdot 10^8$                   | 1400        | Huie and Clifton, 1993 |                                        |
| $CH_2(OH)(OO^\bullet) + Fe^{2+} \rightarrow [FeOHCH_2O_2]^{2+}$                                                          | R(221) | $5.9 \cdot 10^5$                   |             | Khaiikin et al., 1996  |                                        |
| $[FeOHCH_2O_2]^{2+} \rightarrow CH_2(OH)(OO^\bullet) + Fe^{2+}$                                                          | R(222) | $1.3 \cdot 10^3$                   |             | Khaiikin et al., 1996  |                                        |
| $[FeOHCH_2O_2]^{2+} \rightarrow Fe^{3+} + CH_2(OOH)(OH) + OH^- - H_2O$                                                   | R(223) | $1.0 \cdot 10^2$                   |             | Khaiikin et al., 1996  |                                        |
| $[FeOHCH_2O_2]^{2+} + H^+ \rightarrow Fe^{3+} + CH_2(OOH)(OH)$                                                           | R(224) | $3.0 \cdot 10^4$                   |             | Khaiikin et al., 1996  |                                        |
| $CH(OOH)(OH)(OO^\bullet) + OH^- \rightarrow CH(OOH)(O)(OO^\bullet) + H_2O$                                               |        | $4.0 \cdot 10^9$                   |             |                        |                                        |
| $CH(O)(OOH)(OO^\bullet) \rightarrow CHO(OOH) + O_2^\bullet$                                                              |        |                                    |             |                        | 5                                      |
| $CH(OOH)(OH)(OO^\bullet) + OH^- \rightarrow CHO(OOH) + O_2^\bullet + H_2O$                                               | R(225) | $4.0 \cdot 10^9$                   |             |                        | = k( $CH_3CH(OH)(OO^\bullet) + OH^-$ ) |
| $CH(OOH)(OH)(OO^\bullet) \rightarrow CHO(OOH) + HO_2^\bullet$                                                            | R(226) | $1.0 \cdot 10^6$                   |             |                        | 6                                      |

| Reactions                                                                                 |        | $k_{298}$<br>( $M^{-n+1} s^{-1}$ ) | Ea/R<br>(K) | References               | Notes                        |
|-------------------------------------------------------------------------------------------|--------|------------------------------------|-------------|--------------------------|------------------------------|
| <b>Oxidation of Formic acid</b>                                                           |        |                                    |             |                          |                              |
| $CHO(OH) + H_2O_2 + H^+ \rightarrow CHO(OOH) + H_2O + H^+$                                | R(227) | $3.1 \cdot 10^{-4}$                | 5235        | De Filippis et al., 2009 | 7                            |
| $CHO(OOH) + H_2O + H^+ \rightarrow CHO(OH) + H_2O_2 + H^+$                                | R(228) | $3.8 \cdot 10^{-4}$                | 5235        | De Filippis et al., 2009 | 7                            |
| $CHO(OOH) + H^+ \rightarrow CO_2 + H_2O + H^+$                                            | R(229) | $1.2 \cdot 10^{-3}$                | 8735        | De Filippis et al., 2009 | 7                            |
| <b>Oxidation of MHP (Methyl HydroPeroxide)</b>                                            |        |                                    |             |                          |                              |
| $CH_3(OOH) + h\nu \rightarrow CH_2O + HO^* + HO_2^* - O_2$                                | R(230) | Calculated                         |             |                          | = J( $H_2O_2$ )              |
| Pathway 1: $CH_3(OOH) + HO^* \rightarrow CH_3(OO^*) + H_2O$                               |        | $5.0 \cdot 10^8$                   |             |                          | BR: 80% - 8                  |
| Pathway 2: $CH_3(OOH) + HO^* \rightarrow C^*H_2(OOH) + H_2O$                              |        | $1.3 \cdot 10^8$                   |             |                          | BR: 20% - 8                  |
| $C^*H_2(OOH) + O_2 \rightarrow CH_2(OOH)(OO^*)$                                           |        | $2.0 \cdot 10^9$                   |             |                          | 2                            |
| $CH_3(OOH) + HO^* \rightarrow 0.80 CH_3(OO^*) + 0.20 CH_2(OOH)(OO^*) + H_2O - 0.20 O_2$   | R(231) | $6.3 \cdot 10^8$                   |             | Monod et al., 2007       | 8                            |
| Pathway 1: $CH_3(OOH) + NO_3^* \rightarrow CH_3(OO^*) + NO_3^- + H^+$                     |        |                                    |             |                          | BR: 80%                      |
| Pathway 2: $CH_3(OOH) + NO_3^* \rightarrow C^*H_2(OOH) + NO_3^- + H^+$                    |        |                                    |             |                          | BR: 20%                      |
| $C^*H_2(OOH) + O_2 \rightarrow CH_2(OOH)(OO^*)$                                           |        | $2.0 \cdot 10^9$                   |             |                          | 2                            |
| $CH_3(OOH) + NO_3^* \rightarrow 0.80 CH_3(OO^*) + 0.20 CH_2(OOH)(OO^*) + NO_3^- + H^+$    | R(232) | $4.9 \cdot 10^6$                   | 2000        |                          | = k( $H_2O_2 + NO_3^*$ ) - 3 |
| Pathway 1: $CH_3(OOH) + CO_3^* \rightarrow CH_3(OO^*) + HCO_3^-$                          |        |                                    |             |                          | BR: 80%                      |
| Pathway 2: $CH_3(OOH) + CO_3^* \rightarrow C^*H_2(OOH) + HCO_3^-$                         |        |                                    |             |                          | BR: 20%                      |
| $C^*H_2(OOH) + O_2 \rightarrow CH_2(OOH)(OO^*)$                                           |        | $2.0 \cdot 10^9$                   |             |                          | 2                            |
| $CH_3(OOH) + CO_3^* \rightarrow 0.80 CH_3(OO^*) + 0.20 CH_2(OOH)(OO^*) + HCO_3^-$         | R(233) | $4.3 \cdot 10^5$                   |             |                          | = k( $H_2O_2 + CO_3^*$ ) - 3 |
| Pathway 1: $CH_3(OOH) + Cl_2^* \rightarrow CH_3(OO^*) + 2 Cl^- + H^+$                     |        |                                    |             |                          | BR: 80%                      |
| Pathway 2: $CH_3(OOH) + Cl_2^* \rightarrow C^*H_2(OOH) + 2 Cl^- + H^+$                    |        |                                    |             |                          | BR: 20%                      |
| $C^*H_2(OOH) + O_2 \rightarrow CH_2(OOH)(OO^*)$                                           |        | $2.0 \cdot 10^9$                   |             |                          | 2                            |
| $CH_3(OOH) + Cl_2^* \rightarrow 0.80 CH_3(OO^*) + 0.20 CH_2(OOH)(OO^*) + 2 Cl^- + H^+$    | R(234) | $6.2 \cdot 10^6$                   |             |                          | = k( $H_2O_2 + Cl_2^*$ ) - 3 |
| Pathway 1: $CH_3(OOH) + Cl^* \rightarrow CH_3(OO^*) + Cl^- + H^+$                         |        |                                    |             |                          | BR: 80%                      |
| Pathway 2: $CH_3(OOH) + Cl^* \rightarrow C^*H_2(OOH) + Cl^- + H^+$                        |        |                                    |             |                          | BR: 20%                      |
| $C^*H_2(OOH) + O_2 \rightarrow CH_2(OOH)(OO^*)$                                           |        | $2.0 \cdot 10^9$                   |             |                          | 2                            |
| $CH_3(OOH) + Cl^* \rightarrow 0.80 CH_3(OO^*) + 0.20 CH_2(OOH)(OO^*) + Cl^- + H^+$        | R(235) | $2.0 \cdot 10^9$                   |             |                          | = k( $H_2O_2 + Cl^*$ ) - 3   |
| Pathway 1: $CH_3(OOH) + SO_4^* \rightarrow CH_3(OO^*) + SO_4^{2-} + H^+$                  |        |                                    |             |                          | BR: 80%                      |
| Pathway 2: $CH_3(OOH) + SO_4^* \rightarrow C^*H_2(OOH) + SO_4^{2-} + H^+$                 |        |                                    |             |                          | BR: 20%                      |
| $C^*H_2(OOH) + O_2 \rightarrow CH_2(OOH)(OO^*)$                                           |        | $2.0 \cdot 10^9$                   |             |                          | 2                            |
| $CH_3(OOH) + SO_4^* \rightarrow 0.80 CH_3(OO^*) + 0.20 CH_2(OOH)(OO^*) + SO_4^{2-} + H^+$ | R(236) | $1.2 \cdot 10^7$                   |             |                          | = k( $H_2O_2 + SO_4^*$ ) - 3 |
| $CH_3(OOH) + HSO_3^- \rightarrow CH_3(OH) + SO_4^{2-} + H^+$                              | R(237) | $1.8 \cdot 10^7$                   | 3800        | Lind et al., 1987        |                              |
| $CH_3(OOH) + Fe^{2+} \rightarrow Fe^{3+} + CH_2(OH)(OO^*) + OH^- - O_2$                   | R(238) | $1.6 \cdot 10^1$                   |             | Chevallier et al., 2004  |                              |
| $CH_3(OO^*) + HO_2^* \rightarrow CH_3(OOH) + O_2$                                         | R(239) | $4.2 \cdot 10^5$                   | 2700        |                          | = k( $HO_2^* + HO_2^*$ )/2   |
| $CH_3(OO^*) + O_2^* \rightarrow CH_3(OOH) + O_2 + OH^- - H_2O$                            | R(240) | $4.8 \cdot 10^7$                   | 910         |                          | = k( $HO_2^* + O_2^*$ )/2    |
| Pathway 1: $2 CH_3(OO^*) \rightarrow 2 CH_2O + H_2O_2$                                    |        | $2.2 \cdot 10^7$                   |             |                          | BR: 20% - 9                  |
| Pathway 2: $2 CH_3(OO^*) \rightarrow 2 CH_3O^* + O_2$                                     |        | $8.8 \cdot 10^7$                   |             |                          | BR: 80% - 9                  |
| $CH_3O^* \rightarrow C^*H_2OH$                                                            |        |                                    |             |                          | 10                           |
| $C^*H_2OH + O_2 \rightarrow CH_2OH(OO^*)$                                                 |        | $2.0 \cdot 10^9$                   |             |                          | 2                            |
| $2 CH_3(OO^*) \rightarrow 0.40 CH_2O + 1.60 CH_2OH(OO^*) + 0.20 H_2O_2 - 0.80 O_2$        | R(241) | $1.1 \cdot 10^8$                   | 2200        | Herrmann et al., 1999    | 9                            |
| $CH_3(OO^*) + HSO_3^- \rightarrow CH_3(OOH) + SO_3^*$                                     | R(242) | $5.0 \cdot 10^5$                   |             | Herrmann et al., 1999    |                              |
| $CH_3(OO^*) + Fe^{2+} \rightarrow [FeCH_3O_2]^{2+}$                                       | R(243) | $8.6 \cdot 10^5$                   |             | Khaikin et al., 1996     |                              |
| $[FeCH_3O_2]^{2+} \rightarrow CH_3(OO^*) + Fe^{2+}$                                       | R(244) | $1.3 \cdot 10^3$                   |             | Khaikin et al., 1996     |                              |
| $[FeCH_3O_2]^{2+} \rightarrow Fe^{3+} + CH_3(OOH) + OH^- - H_2O$                          | R(245) | $1.0 \cdot 10^2$                   |             | Khaikin et al., 1996     |                              |
| $[FeCH_3O_2]^{2+} + H^+ \rightarrow Fe^{3+} + CH_3(OOH)$                                  | R(246) | $3.0 \cdot 10^4$                   |             | Khaikin et al., 1996     |                              |

| Reactions                                                                         |        | $k_{298}$<br>( $M^{-n+1} s^{-1}$ ) | Ea/R<br>(K) | References                 | Notes                                                         |
|-----------------------------------------------------------------------------------|--------|------------------------------------|-------------|----------------------------|---------------------------------------------------------------|
| $CH_2(OOH)(OO^*) + OH^- \rightarrow CH_2(OO^*)(OO^*) + H_2O$                      |        | $4.0 \cdot 10^9$                   |             |                            |                                                               |
| $CH_2(OO^*)(OO^*) \rightarrow CHO(OH) + O_2^{\bullet -}$                          |        |                                    |             |                            | 11                                                            |
| $CH_2(OOH)(OO^*) + OH^- \rightarrow CHO(OH) + O_2^{\bullet -} + H_2O$             | R(247) | $4.0 \cdot 10^9$                   |             |                            | = $k(CH_3CH(OH)(OO^*) + OH^-)$ - 12                           |
| $CH_2(OOH)(OO^*) \rightarrow CHO(OH) + HO_2^{\bullet}$                            | R(248) | $1.0 \cdot 10^1$                   |             |                            | = $k(CH_2(OH)(OO^*) \rightarrow CH_2O + HO_2^{\bullet})$ - 13 |
| <b>Oxidation of Methanol</b>                                                      |        |                                    |             |                            |                                                               |
| $CH_3(OH) + HO^* \rightarrow C^*H_2(OH) + H_2O$                                   |        | $1.0 \cdot 10^9$                   | 600         | Elliot and McCracken, 1989 |                                                               |
| $C^*H_2(OH) + O_2 \rightarrow CH_2(OH)(OO^*)$                                     |        | $4.2 \cdot 10^9$                   |             | Schaefer et al., 2014      |                                                               |
| $CH_3(OH) + HO^* \rightarrow CH_2(OH)(OO^*) + H_2O - O_2$                         | R(249) | $1.0 \cdot 10^9$                   | 600         | Elliot and McCracken, 1989 |                                                               |
| $CH_3(OH) + NO_3^* \rightarrow C^*H_2(OH) + NO_3^- + H^+$                         |        |                                    |             |                            |                                                               |
| $C^*H_2(OH) + O_2 \rightarrow CH_2(OH)(OO^*)$                                     |        | $4.2 \cdot 10^9$                   |             | Schaefer et al., 2014      |                                                               |
| $CH_3(OH) + NO_3^* \rightarrow CH_2(OH)(OO^*) + NO_3^- + H^+ - O_2$               | R(250) | $5.4 \cdot 10^5$                   | 4300        | Herrmann and Zellner, 1998 |                                                               |
| $CH_3(OH) + CO_3^* \rightarrow C^*H_2(OH) + HCO_3^-$                              |        |                                    |             |                            |                                                               |
| $C^*H_2(OH) + O_2 \rightarrow CH_2(OH)(OO^*)$                                     |        | $4.2 \cdot 10^9$                   |             | Schaefer et al., 2014      |                                                               |
| $CH_3(OH) + CO_3^* \rightarrow CH_2(OH)(OO^*) + HCO_3^- - O_2$                    | R(251) | $5.7 \cdot 10^3$                   | 3100        | Clifton and Huie, 1993     |                                                               |
| $CH_3(OH) + Cl_2^* \rightarrow C^*H_2(OH) + 2 Cl^- + H^+$                         |        |                                    |             |                            |                                                               |
| $C^*H_2(OH) + O_2 \rightarrow CH_2(OH)(OO^*)$                                     |        | $4.2 \cdot 10^9$                   |             | Schaefer et al., 2014      |                                                               |
| $CH_3(OH) + Cl_2^* \rightarrow CH_2(OH)(OO^*) + 2 Cl^- + H^+ - O_2$               | R(252) | $5.0 \cdot 10^4$                   | 5500        | Jacobi et al., 1999        |                                                               |
| $CH_3(OH) + Cl^* \rightarrow C^*H_2(OH) + Cl^- + H^+$                             |        |                                    |             |                            |                                                               |
| $C^*H_2(OH) + O_2 \rightarrow CH_2(OH)(OO^*)$                                     |        | $4.2 \cdot 10^9$                   |             | Schaefer et al., 2014      |                                                               |
| $CH_3(OH) + Cl^* \rightarrow CH_2(OH)(OO^*) + Cl^- + H^+ - O_2$                   | R(253) | $1.0 \cdot 10^9$                   | 1450        | Buxton et al., 2000        |                                                               |
| $CH_3(OH) + SO_4^* \rightarrow C^*H_2(OH) + SO_4^{2-} + H^+$                      |        |                                    |             |                            |                                                               |
| $C^*H_2(OH) + O_2 \rightarrow CH_2(OH)(OO^*)$                                     |        | $4.2 \cdot 10^9$                   |             | Schaefer et al., 2014      |                                                               |
| $CH_3(OH) + SO_4^* \rightarrow CH_2(OH)(OO^*) + SO_4^{2-} + H^+ - O_2$            | R(254) | $9.0 \cdot 10^6$                   | 2200        | Clifton and Huie, 1989     |                                                               |
| <b>Oxidation of Formaldehyde</b>                                                  |        |                                    |             |                            | 14                                                            |
| Pathway 1: $CH_2(OH)(OH) + HO^* \rightarrow CH^*(OH)(OH) + H_2O$                  |        | $5.4 \cdot 10^8$                   |             |                            | BR: 70% - 15                                                  |
| $CH^*(OH)(OH) + O_2 \rightarrow CH(OH)(OH)(OO^*)$                                 |        | $2.0 \cdot 10^9$                   |             |                            | 2                                                             |
| Pathway 2: $CH_2(OH)(OH) + HO^* \rightarrow CH_2(OH)(O^*) + H_2O$                 |        | $2.4 \cdot 10^8$                   |             |                            | BR: 30% - 15                                                  |
| $CH_2(OH)(O^*) \rightarrow C^*H(OH)(OH)$                                          |        |                                    |             |                            | 10                                                            |
| $CH^*(OH)(OH) + O_2 \rightarrow CH(OH)(OH)(OO^*)$                                 |        | $2.0 \cdot 10^9$                   |             |                            | 2                                                             |
| $CH_2(OH)(OH) + HO^* \rightarrow CH(OH)(OH)(OO^*) + H_2O - O_2$                   | R(255) | $7.8 \cdot 10^8$                   | 1000        | Chin and Wine, 1994        | 16                                                            |
| Pathway 1: $CH_2(OH)(OH) + NO_3^* \rightarrow CH^*(OH)(OH) + NO_3^- + H^+ - O_2$  |        |                                    |             |                            | BR: 70%                                                       |
| $CH^*(OH)(OH) + O_2 \rightarrow CH(OH)(OH)(OO^*)$                                 |        | $2.0 \cdot 10^9$                   |             |                            | 2                                                             |
| Pathway 2: $CH_2(OH)(OH) + NO_3^* \rightarrow CH_2(OH)(O^*) + NO_3^- + H^+ - O_2$ |        |                                    |             |                            | BR: 30%                                                       |
| $CH_2(OH)(O^*) \rightarrow C^*H(OH)(OH)$                                          |        |                                    |             |                            | 10                                                            |
| $CH^*(OH)(OH) + O_2 \rightarrow CH(OH)(OH)(OO^*)$                                 |        | $2.0 \cdot 10^9$                   |             |                            | 2                                                             |
| $CH_2(OH)(OH) + NO_3^* \rightarrow CH(OH)(OH)(OO^*) + NO_3^- + H^+ - O_2$         | R(256) | $1.0 \cdot 10^6$                   | 4500        | Exner et al., 1993         | 3                                                             |
| Pathway 1: $CH_2(OH)(OH) + CO_3^* \rightarrow CH^*(OH)(OH) + HCO_3^- - O_2$       |        |                                    |             |                            | BR: 70%                                                       |
| $CH^*(OH)(OH) + O_2 \rightarrow CH(OH)(OH)(OO^*)$                                 |        | $2.0 \cdot 10^9$                   |             |                            | 2                                                             |
| Pathway 2: $CH_2(OH)(OH) + CO_3^* \rightarrow CH_2(OH)(O^*) + HCO_3^- - O_2$      |        |                                    |             |                            | BR: 30%                                                       |
| $CH_2(OH)(O^*) \rightarrow C^*H(OH)(OH)$                                          |        |                                    |             |                            | 10                                                            |
| $CH^*(OH)(OH) + O_2 \rightarrow CH(OH)(OH)(OO^*)$                                 |        | $2.0 \cdot 10^9$                   |             |                            | 2                                                             |
| $CH_2(OH)(OH) + CO_3^* \rightarrow CH(OH)(OH)(OO^*) + HCO_3^- - O_2$              | R(257) | $1.3 \cdot 10^4$                   |             | Zellner et al., 1996       | 3                                                             |

| Reactions                                                                                             |        | $k_{298}$<br>( $M^{-n+1} s^{-1}$ ) | Ea/R<br>(K) | References            | Notes                                  |
|-------------------------------------------------------------------------------------------------------|--------|------------------------------------|-------------|-----------------------|----------------------------------------|
| Pathway 1: $CH_2(OH)(OH) + Cl_2^{\bullet} \rightarrow CH^*(OH)(OH) + 2 Cl^- + H^+ - O_2$              |        |                                    |             |                       | BR: 70%                                |
| $CH^*(OH)(OH) + O_2 \rightarrow CH(OH)(OH)(OO^{\bullet})$                                             |        | $2.0 \cdot 10^9$                   |             |                       | 2                                      |
| Pathway 2: $CH_2(OH)(OH) + Cl_2^{\bullet} \rightarrow CH_2(OH)(O^{\bullet}) + 2 Cl^- + H^+ - O_2$     |        |                                    |             |                       | BR: 30%                                |
| $CH_2(OH)(O^{\bullet}) \rightarrow C^*H(OH)(OH)$                                                      |        |                                    |             |                       | 10                                     |
| $CH^*(OH)(OH) + O_2 \rightarrow CH(OH)(OH)(OO^{\bullet})$                                             |        | $2.0 \cdot 10^9$                   |             |                       | 2                                      |
| $CH_2(OH)(OH) + Cl_2^{\bullet} \rightarrow CH(OH)(OH)(OO^{\bullet}) + 2 Cl^- + H^+ - O_2$             | R(258) | $3.6 \cdot 10^4$                   | 4400        | Jacobi et al., 1999   | 3                                      |
| Pathway 1: $CH_2(OH)(OH) + Cl^{\bullet} \rightarrow CH^*(OH)(OH) + Cl^- + H^+ - O_2$                  |        |                                    |             |                       | BR: 70%                                |
| $CH^*(OH)(OH) + O_2 \rightarrow CH(OH)(OH)(OO^{\bullet})$                                             |        | $2.0 \cdot 10^9$                   |             |                       | 2                                      |
| Pathway 2: $CH_2(OH)(OH) + Cl^{\bullet} \rightarrow CH_2(OH)(O^{\bullet}) + Cl^- + H^+ - O_2$         |        |                                    |             |                       | BR: 30%                                |
| $CH_2(OH)(O^{\bullet}) \rightarrow C^*H(OH)(OH)$                                                      |        |                                    |             |                       | 10                                     |
| $CH^*(OH)(OH) + O_2 \rightarrow CH(OH)(OH)(OO^{\bullet})$                                             |        | $2.0 \cdot 10^9$                   |             |                       | 2                                      |
| $CH_2(OH)(OH) + Cl^{\bullet} \rightarrow CH(OH)(OH)(OO^{\bullet}) + Cl^- + H^+ - O_2$                 | R(259) | $1.4 \cdot 10^9$                   |             | Buxton et al., 2000   | 3                                      |
| Pathway 1: $CH_2(OH)(OH) + SO_4^{\bullet-} \rightarrow CH^*(OH)(OH) + SO_4^{2-} + H^+ - O_2$          |        |                                    |             |                       | BR: 70%                                |
| $CH^*(OH)(OH) + O_2 \rightarrow CH(OH)(OH)(OO^{\bullet})$                                             |        | $2.0 \cdot 10^9$                   |             |                       | 2                                      |
| Pathway 2: $CH_2(OH)(OH) + SO_4^{\bullet-} \rightarrow CH_2(OH)(O^{\bullet}) + SO_4^{2-} + H^+ - O_2$ |        |                                    |             |                       | BR: 30%                                |
| $CH_2(OH)(O^{\bullet}) \rightarrow C^*H(OH)(OH)$                                                      |        |                                    |             |                       | 10                                     |
| $CH^*(OH)(OH) + O_2 \rightarrow CH(OH)(OH)(OO^{\bullet})$                                             |        | $2.0 \cdot 10^9$                   |             |                       | 2                                      |
| $CH_2(OH)(OH) + SO_4^{\bullet-} \rightarrow CH(OH)(OH)(OO^{\bullet}) + SO_4^{2-} + H^+ - O_2$         | R(260) | $1.4 \cdot 10^7$                   | 1300        | Buxton et al., 1990   | 3                                      |
| $CH_2(OH)(OH) + FeO^{2+} \rightarrow CHO(OH) + Fe^{3+} + HO_2^{\bullet} + OH^- - O_2$                 | R(261) | $4.0 \cdot 10^2$                   | 5350        | Jacobsen et al., 1998 |                                        |
| $CH(OH)(OH)(OO^{\bullet}) + OH^- \rightarrow CH(OH)(O^{\bullet})(OO^{\bullet}) + H_2O$                |        | $4.0 \cdot 10^9$                   |             |                       |                                        |
| $CH(OH)(O^{\bullet})(OO^{\bullet}) \rightarrow CHO(OH) + O_2^{\bullet-}$                              |        |                                    |             |                       | 5                                      |
| $CH(OH)(OH)(OO^{\bullet}) + OH^- \rightarrow CHO(OH) + O_2^{\bullet-} + H_2O$                         | R(262) | $4.0 \cdot 10^9$                   |             |                       | = $k(CH_3CH(OH)(OO^{\bullet}) + OH^-)$ |
| $CH(OH)(OH)(OO^{\bullet}) \rightarrow CHO(OH) + HO_2^{\bullet}$                                       | R(263) | $1.0 \cdot 10^6$                   |             |                       | 17                                     |
| <b>Oxidation of Formic acid</b>                                                                       |        |                                    |             |                       |                                        |
| $CHO(OH) + HO^{\bullet} \rightarrow CO(OH)(OO^{\bullet}) + H_2O - O_2$                                | R(264) | $1.0 \cdot 10^8$                   | 1000        | Chin and Wine, 1994   |                                        |
| $CHO(O^{\bullet}) + HO^{\bullet} \rightarrow CO(O^{\bullet})(OO^{\bullet}) + H_2O - O_2$              | R(265) | $3.4 \cdot 10^9$                   | 1200        | Chin and Wine, 1994   |                                        |
| $CHO(OH) + NO_3^{\bullet} \rightarrow CO(OH)(OO^{\bullet}) + NO_3^- + H^+ - O_2$                      | R(266) | $3.8 \cdot 10^5$                   | 3400        | Exner et al., 1994    |                                        |
| $CHO(O^{\bullet}) + NO_3^{\bullet} \rightarrow CO(O^{\bullet})(OO^{\bullet}) + NO_3^- + H^+ - O_2$    | R(267) | $5.1 \cdot 10^7$                   | 2200        | Exner et al., 1994    |                                        |
| $CHO(O^{\bullet}) + CO_3^{\bullet-} \rightarrow CO(O^{\bullet})(OO^{\bullet}) + HCO_3^- - O_2$        | R(268) | $1.6 \cdot 10^5$                   |             | Zellner et al., 1996  |                                        |
| $CHO(OH) + Cl_2^{\bullet} \rightarrow CO(OH)(OO^{\bullet}) + 2 Cl^- + H^+ - O_2$                      | R(269) | $8.0 \cdot 10^4$                   | 4500        | Jacobi et al., 1999   |                                        |
| $CHO(O^{\bullet}) + Cl_2^{\bullet} \rightarrow CO(O^{\bullet})(OO^{\bullet}) + 2 Cl^- + H^+ - O_2$    | R(270) | $1.3 \cdot 10^6$                   |             | Jacobi et al., 1996   |                                        |
| $CHO(OH) + Cl^{\bullet} \rightarrow CO(OH)(OO^{\bullet}) + Cl^- + H^+ - O_2$                          | R(271) | $1.3 \cdot 10^8$                   | 1100        | Buxton et al., 2000   |                                        |
| $CHO(O^{\bullet}) + Cl^{\bullet} \rightarrow CO(O^{\bullet})(OO^{\bullet}) + Cl^- + H^+ - O_2$        | R(272) | $4.2 \cdot 10^9$                   | 1900        | Buxton et al., 2000   |                                        |
| $CHO(OH) + FeO^{2+} \rightarrow CO(OH)(OO^{\bullet}) + Fe^{3+} + H_2O - H^+ - O_2$                    | R(273) | $1.6 \cdot 10^2$                   | 2680        | Jacobsen et al., 1998 |                                        |
| $CHO(O^{\bullet}) + FeO^{2+} \rightarrow CO(O^{\bullet})(OO^{\bullet}) + Fe^{3+} + H_2O - H^+ - O_2$  | R(274) | $3.0 \cdot 10^5$                   |             | Jacobsen et al., 1998 |                                        |
| $CO(OH)(OO^{\bullet}) + OH^- \rightarrow CO(O^{\bullet})(OO^{\bullet}) + H_2O$                        |        | $4.0 \cdot 10^9$                   |             |                       |                                        |
| $CO(O^{\bullet})(OO^{\bullet}) \rightarrow CO_2 + O_2^{\bullet-}$                                     |        |                                    |             |                       | 5                                      |
| $CO(OH)(OO^{\bullet}) + OH^- \rightarrow CO_2 + O_2^{\bullet-} + H_2O$                                | R(275) | $4.0 \cdot 10^9$                   |             |                       | = $k(CH_3CH(OH)(OO^{\bullet}) + OH^-)$ |
| $CO(OH)(OO^{\bullet}) \rightarrow CO_2 + HO_2^{\bullet}$                                              | R(276) | $1.0 \cdot 10^6$                   |             |                       | 18                                     |
| $CO(O^{\bullet})(OO^{\bullet}) \rightarrow CO_2 + O_2^{\bullet-}$                                     | R(277) | $1.0 \cdot 10^6$                   |             |                       | 19                                     |

## C2 compounds

For C2 oxidation, chemical pathways with branching ratio < 10% are not considered.

| Reactions                                                                                                                                              |        | $k_{298}$<br>( $M^{-n+1} s^{-1}$ ) | Ea/R<br>(K) | References                 | Notes        |
|--------------------------------------------------------------------------------------------------------------------------------------------------------|--------|------------------------------------|-------------|----------------------------|--------------|
| <b>Oxidation of Ethanol</b>                                                                                                                            |        |                                    |             |                            |              |
| Pathway 1: $CH_3CH_2(OH) + HO^{\bullet} \rightarrow CH_3C^{\bullet}H(OH) + H_2O$                                                                       |        | $1.9 \cdot 10^9$                   |             |                            | BR: 90% - 20 |
| $CH_3C^{\bullet}H(OH) + O_2 \rightarrow CH_3CH(OH)(OO^{\bullet})$                                                                                      |        | $4.6 \cdot 10^9$                   |             | Adams and Willson, 1969    |              |
| Pathway 2: $CH_3CH_2(OH) + HO^{\bullet} \rightarrow CH_2^{\bullet}CH_2(OH) + H_2O$                                                                     |        | $2.0 \cdot 10^8$                   |             |                            | BR: 10% - 20 |
| $CH_2^{\bullet}CH_2(OH) + O_2 \rightarrow CH_2(OH)CH_2(OO^{\bullet})$                                                                                  |        | $4.6 \cdot 10^9$                   |             | Adams and Willson, 1969    |              |
| $CH_3CH_2(OH) + HO^{\bullet} \rightarrow 0.90 CH_3CH(OH)(OO^{\bullet}) + 0.10 CH_2(OH)CH_2(OO^{\bullet}) + H_2O - O_2$                                 | R(278) | $2.1 \cdot 10^9$                   | 830         | Monod et al., 2005         |              |
| Pathway 1: $CH_3CH_2(OH) + NO_3^{\bullet} \rightarrow CH_3C^{\bullet}H(OH) + NO_3^- + H^+$                                                             |        | $2.0 \cdot 10^6$                   |             |                            | BR: 90%      |
| $CH_3C^{\bullet}H(OH) + O_2 \rightarrow CH_3CH(OH)(OO^{\bullet})$                                                                                      |        | $4.6 \cdot 10^9$                   |             | Adams and Willson, 1969    |              |
| Pathway 2: $CH_3CH_2(OH) + NO_3^{\bullet} \rightarrow CH_2^{\bullet}CH_2(OH) + NO_3^- + H^+$                                                           |        | $2.0 \cdot 10^5$                   |             |                            | BR: 10%      |
| $CH_2^{\bullet}CH_2(OH) + O_2 \rightarrow CH_2(OH)CH_2(OO^{\bullet})$                                                                                  |        | $4.6 \cdot 10^9$                   |             | Adams and Willson, 1969    |              |
| $CH_3CH_2(OH) + NO_3^{\bullet} \rightarrow 0.90 CH_3CH(OH)(OO^{\bullet}) + 0.10 CH_2(OH)CH_2(OO^{\bullet}) + NO_3^- + H^+ - O_2$                       | R(279) | $2.2 \cdot 10^6$                   | 3300        | Herrmann and Zellner, 1998 | 3            |
| Pathway 1: $CH_3CH_2(OH) + FeO^{2+} \rightarrow CH_3C^{\bullet}H(OH) + Fe^{3+} + OH^-$                                                                 |        | $2.2 \cdot 10^3$                   |             |                            | BR: 90%      |
| $CH_3C^{\bullet}H(OH) + O_2 \rightarrow CH_3CH(OH)(OO^{\bullet})$                                                                                      |        | $4.6 \cdot 10^9$                   |             | Adams and Willson, 1969    |              |
| Pathway 2: $CH_3CH_2(OH) + FeO^{2+} \rightarrow CH_2^{\bullet}CH_2(OH) + Fe^{3+} + OH^-$                                                               |        | $3.0 \cdot 10^2$                   |             |                            | BR: 10%      |
| $CH_2^{\bullet}CH_2(OH) + O_2 \rightarrow CH_2(OH)CH_2(OO^{\bullet})$                                                                                  |        | $4.6 \cdot 10^9$                   |             | Adams and Willson, 1969    |              |
| $CH_3CH_2(OH) + FeO^{2+} \rightarrow 0.90 CH_3CH(OH)(OO^{\bullet}) + 0.10 CH_2(OH)CH_2(OO^{\bullet}) + Fe^{3+} + OH^- - O_2$                           | R(280) | $2.5 \cdot 10^3$                   |             | Jacobsen et al., 1998      | 3            |
| Pathway 1: $CH_3CH_2(OH) + SO_4^{\bullet-} \rightarrow CH_3C^{\bullet}H(OH) + SO_4^{2-} + H^+$                                                         |        | $3.7 \cdot 10^7$                   |             |                            | BR: 90%      |
| $CH_3C^{\bullet}H(OH) + O_2 \rightarrow CH_3CH(OH)(OO^{\bullet})$                                                                                      |        | $4.6 \cdot 10^9$                   |             | Adams and Willson, 1969    |              |
| Pathway 2: $CH_3CH_2(OH) + SO_4^{\bullet-} \rightarrow CH_2^{\bullet}CH_2(OH) + SO_4^{2-} + H^+$                                                       |        | $4.0 \cdot 10^6$                   |             |                            | BR: 10%      |
| $CH_2^{\bullet}CH_2(OH) + O_2 \rightarrow CH_2(OH)CH_2(OO^{\bullet})$                                                                                  |        | $4.6 \cdot 10^9$                   |             | Adams and Willson, 1969    |              |
| $CH_3CH_2(OH) + SO_4^{\bullet-} \rightarrow 0.90 CH_3CH(OH)(OO^{\bullet}) + 0.10 CH_2(OH)CH_2(OO^{\bullet}) + SO_4^{2-} + H^+ - O_2$                   | R(281) | $4.1 \cdot 10^7$                   | 1760        | Clifton and Huie, 1989     | 3            |
| Pathway 1: $CH_3CH_2(OH) + Cl_2^{\bullet-} \rightarrow CH_3C^{\bullet}H(OH) + 2 Cl^- + H^+$                                                            |        | $1.1 \cdot 10^5$                   |             |                            | BR: 90%      |
| $CH_3C^{\bullet}H(OH) + O_2 \rightarrow CH_3CH(OH)(OO^{\bullet})$                                                                                      |        | $4.6 \cdot 10^9$                   |             | Adams and Willson, 1969    |              |
| Pathway 2: $CH_3CH_2(OH) + Cl_2^{\bullet-} \rightarrow CH_2^{\bullet}CH_2(OH) + 2 Cl^- + H^+$                                                          |        | $1.0 \cdot 10^4$                   |             |                            | BR: 10%      |
| $CH_2^{\bullet}CH_2(OH) + O_2 \rightarrow CH_2(OH)CH_2(OO^{\bullet})$                                                                                  |        | $4.6 \cdot 10^9$                   |             | Adams and Willson, 1969    |              |
| $CH_3CH_2(OH) + Cl_2^{\bullet-} \rightarrow 0.90 CH_3CH(OH)(OO^{\bullet}) + 0.10 CH_2(OH)CH_2(OO^{\bullet}) + 2 Cl^- + H^+ - O_2$                      | R(282) | $1.2 \cdot 10^5$                   |             | Zellner et al., 1996       | 3            |
| Pathway 1: $CH_3CH_2(OH) + CO_3^{\bullet-} \rightarrow CH_3C^{\bullet}H(OH) + CO_3^{2-} + H^+$                                                         |        | $1.3 \cdot 10^4$                   |             |                            | BR: 90%      |
| $CH_3C^{\bullet}H(OH) + O_2 \rightarrow CH_3CH(OH)(OO^{\bullet})$                                                                                      |        | $4.6 \cdot 10^9$                   |             | Adams and Willson, 1969    |              |
| Pathway 2: $CH_3CH_2(OH) + CO_3^{\bullet-} \rightarrow CH_2^{\bullet}CH_2(OH) + CO_3^{2-} + H^+$                                                       |        | $2.0 \cdot 10^3$                   |             |                            | BR: 10%      |
| $CH_2^{\bullet}CH_2(OH) + O_2 \rightarrow CH_2(OH)CH_2(OO^{\bullet})$                                                                                  |        | $4.6 \cdot 10^9$                   |             | Adams and Willson, 1969    |              |
| $CH_3CH_2(OH) + CO_3^{\bullet-} \rightarrow 0.90 CH_3CH(OH)(OO^{\bullet}) + 0.10 CH_2(OH)CH_2(OO^{\bullet}) + CO_3^{2-} + H^+ - O_2$                   | R(283) | $1.5 \cdot 10^4$                   |             | Kuz'min, 1972              | 3            |
| $CH_3CH(OH)(OO^{\bullet}) + OH^- \rightarrow CH_3CH(O)(OO^{\bullet}) + H_2O$                                                                           |        | $4.0 \cdot 10^9$                   |             |                            |              |
| $CH_3CH(O)(OO^{\bullet}) \rightarrow CH_3CHO + O_2^{\bullet-}$                                                                                         |        |                                    |             |                            | 5            |
| $CH_3CH(OH)(OO^{\bullet}) + OH^- \rightarrow CH_3CHO + O_2^{\bullet-} + H_2O$                                                                          | R(284) | $4.0 \cdot 10^9$                   |             | Neta et al., 1990          |              |
| $CH_3CH(OH)(OO^{\bullet}) \rightarrow CH_3CHO + HO_2^{\bullet}$                                                                                        | R(285) | $5.2 \cdot 10^1$                   | 7217        | Von Sonntag, 1987          |              |
| Pathway 1: $2 CH_2(OH)CH_2(OO^{\bullet}) \rightarrow 2 CH_2(OH)CHO + H_2O_2$                                                                           |        | $5.0 \cdot 10^7$                   |             |                            | BR: 50%      |
| Pathway 2: $2 CH_2(OH)CH_2(OO^{\bullet}) \rightarrow CH_2(OH)CH_2(OH) + CH_2(OH)CHO + O_2$                                                             |        | $3.3 \cdot 10^7$                   |             |                            | BR: 33%      |
| Pathway 3: $2 CH_2(OH)CH_2(OO^{\bullet}) \rightarrow 2 CH_2(O^{\bullet})CH_2(OH) + O_2$                                                                |        | $1.7 \cdot 10^7$                   |             |                            | BR: 17%      |
| $CH_2(O^{\bullet})CH_2(OH) \rightarrow C^{\bullet}H_2(OH) + CH_2O$                                                                                     |        |                                    |             |                            | 21 - 22      |
| $C^{\bullet}H_2(OH) + O_2 \rightarrow CH_2(OH)(OO^{\bullet})$                                                                                          |        | $2.0 \cdot 10^9$                   |             |                            | 2            |
| $2 CH_2(OH)CH_2(OO^{\bullet}) \rightarrow 1.33 CH_2(OH)CHO + 0.33 CH_2(OH)CH_2(OH) + 0.34 CH_2(OH)(OO^{\bullet}) + 0.34 CH_2O + 0.5 H_2O_2 + 0.16 O_2$ | R(286) | $1.0 \cdot 10^8$                   |             | Piesiak et al., 1984       | 23           |

| Reactions                                                                                     | $k_{298}$<br>( $M^{-n+1} s^{-1}$ ) | Ea/R<br>(K) | References                       | Notes                                |
|-----------------------------------------------------------------------------------------------|------------------------------------|-------------|----------------------------------|--------------------------------------|
| <b>Oxidation of Ethylene glycol</b>                                                           |                                    |             |                                  |                                      |
| $CH_2(OH)CH_2(OH) + HO^\bullet \rightarrow CH_2(OH)CH^\bullet(OH) + H_2O$                     | $1.7 \cdot 10^9$                   | 1191        |                                  |                                      |
| $CH_2(OH)CH^\bullet(OH) + O_2 \rightarrow CH_2(OH)CH(OH)(OO^\bullet)$                         | $3.2 \cdot 10^9$                   |             | Adams and Willson, 1969          |                                      |
| $CH_2(OH)CH_2(OH) + HO^\bullet \rightarrow CH_2(OH)CH(OH)(OO^\bullet) + H_2O - O_2$           | R(287) $1.7 \cdot 10^9$            | 1191        | Hoffmann et al., 2009            |                                      |
| $CH_2(OH)CH_2(OH) + NO_3^\bullet \rightarrow CH_2(OH)CH^\bullet(OH) + NO_3^- + H^+$           | $6.6 \cdot 10^6$                   | 2117        |                                  |                                      |
| $CH_2(OH)CH^\bullet(OH) + O_2 \rightarrow CH_2(OH)CH(OH)(OO^\bullet)$                         | $3.2 \cdot 10^9$                   |             | Adams and Willson, 1969          |                                      |
| $CH_2(OH)CH_2(OH) + NO_3^\bullet \rightarrow CH_2(OH)CH(OH)(OO^\bullet) + NO_3^- + H^+ - O_2$ | R(288) $6.6 \cdot 10^6$            | 2117        | Hoffmann et al., 2009            |                                      |
| $CH_2(OH)CH(OH)(OO^\bullet) + OH^- \rightarrow CH_2(OH)CH(O)(OO^\bullet) + H_2O$              |                                    |             |                                  | 5                                    |
| $CH_2(OH)CH(O)(OO^\bullet) \rightarrow CH_2(OH)CHO + O_2^\bullet$                             |                                    |             |                                  | = $k(CH_3CH(OH)(OO^\bullet) + OH^-)$ |
| $CH_2(OH)CH(OH)(OO^\bullet) + OH^- \rightarrow CH_2(OH)CHO + O_2^\bullet + H_2O$              | R(289) $4.0 \cdot 10^9$            |             |                                  |                                      |
| $CH_2(OH)CH(OH)(OO^\bullet) \rightarrow CH_2(OH)CHO + HO_2^\bullet$                           | R(290) $1.9 \cdot 10^2$            |             |                                  | 4                                    |
| <b>Oxidation of Acetaldehyde</b>                                                              |                                    |             |                                  |                                      |
| $CH_3CHO + HO^\bullet \rightarrow CH_3C^\bullet O + H_2O$                                     | $3.6 \cdot 10^9$                   |             |                                  | 25                                   |
| $CH_3C^\bullet O + O_2 \rightarrow CH_3CO(OO^\bullet)$                                        | $2.0 \cdot 10^9$                   |             |                                  | 2                                    |
| $CH_3CHO + HO^\bullet \rightarrow CH_3CO(OO^\bullet) + H_2O - O_2$                            | R(291) $3.6 \cdot 10^9$            |             | Schuchmann and Von Sonntag, 1988 | 16                                   |
| $CH_3CHO + NO_3^\bullet \rightarrow CH_3C^\bullet O + NO_3^- + H^+$                           | $3.1 \cdot 10^6$                   |             |                                  |                                      |
| $CH_3C^\bullet O + O_2 \rightarrow CH_3CO(OO^\bullet)$                                        | $2.0 \cdot 10^9$                   |             |                                  | 2                                    |
| $CH_3CHO + NO_3^\bullet \rightarrow CH_3CO(OO^\bullet) + NO_3^- + H^+ - O_2$                  | R(292) $3.1 \cdot 10^6$            |             | Rousse and George, 2004          | 3 - 26                               |
| $CH_3CHO + Cl_2^\bullet \rightarrow CH_3C^\bullet O + 2 Cl^- + H^+$                           | $4.0 \cdot 10^4$                   |             |                                  |                                      |
| $CH_3C^\bullet O + O_2 \rightarrow CH_3CO(OO^\bullet)$                                        | $2.0 \cdot 10^9$                   |             |                                  | 2                                    |
| $CH_3CHO + Cl_2^\bullet \rightarrow CH_3CO(OO^\bullet) + 2 Cl^- + H^+ - O_2$                  | R(293) $4.0 \cdot 10^4$            |             | Jacobi et al., 1996              | 3 - 27                               |
| Pathway 1: $CH_3CH(OH)(OH) + HO^\bullet \rightarrow CH_3C^\bullet(OH)(OH) + H_2O$             | $8.0 \cdot 10^8$                   |             |                                  | BR: 67% - 28                         |
| $CH_3C^\bullet(OH)(OH) + O_2 \rightarrow CH_3C(OH)(OH)(OO^\bullet)$                           | $2.0 \cdot 10^9$                   |             |                                  | 2                                    |
| Pathway 2: $CH_3CH(OH)(OH) + HO^\bullet \rightarrow CH_3CH(OH)(O^\bullet) + H_2O$             | $4.0 \cdot 10^8$                   |             |                                  | BR: 33% - 28                         |
| $CH_3CH(OH)(O^\bullet) \rightarrow CH_3C^\bullet(OH)(OH)$                                     |                                    |             |                                  | 10                                   |
| $CH_3C^\bullet(OH)(OH) + O_2 \rightarrow CH_3C(OH)(OH)(OO^\bullet)$                           | $2.0 \cdot 10^9$                   |             |                                  | 2                                    |
| $CH_3CH(OH)(OH) + HO^\bullet \rightarrow CH_3C(OH)(OH)(OO^\bullet) + H_2O - O_2$              | R(294) $1.2 \cdot 10^9$            |             | Schuchmann and Von Sonntag, 1988 | 16                                   |
| Pathway 1: $CH_3CH(OH)(OH) + NO_3^\bullet \rightarrow CH_3C^\bullet(OH)(OH) + NO_3^- + H^+$   | $7.4 \cdot 10^5$                   |             |                                  | BR: 67%                              |
| $CH_3C^\bullet(OH)(OH) + O_2 \rightarrow CH_3C(OH)(OH)(OO^\bullet)$                           | $2.0 \cdot 10^9$                   |             |                                  | 2                                    |
| Pathway 2: $CH_3CH(OH)(OH) + NO_3^\bullet \rightarrow CH_3CH(OH)(O^\bullet) + NO_3^- + H^+$   | $3.6 \cdot 10^5$                   |             |                                  | BR: 33%                              |
| $CH_3CH(OH)(O^\bullet) \rightarrow CH_3C^\bullet(OH)(OH)$                                     |                                    |             |                                  | 10                                   |
| $CH_3C^\bullet(OH)(OH) + O_2 \rightarrow CH_3C(OH)(OH)(OO^\bullet)$                           | $2.0 \cdot 10^9$                   |             |                                  | 2                                    |
| $CH_3CH(OH)(OH) + NO_3^\bullet \rightarrow CH_3C(OH)(OH)(OO^\bullet) + NO_3^- + H^+ - O_2$    | R(295) $1.1 \cdot 10^6$            |             | Rousse and George, 2004          | 3 - 26                               |
| Pathway1: $CH_3CH(OH)(OH) + Cl_2^\bullet \rightarrow CH_3C^\bullet(OH)(OH) + 2 Cl^- + H^+$    | $2.7 \cdot 10^4$                   |             |                                  | BR: 67%                              |
| $CH_3C^\bullet(OH)(OH) + O_2 \rightarrow CH_3C(OH)(OH)(OO^\bullet)$                           | $2.0 \cdot 10^9$                   |             |                                  | 2                                    |
| Pathway 2: $CH_3CH(OH)(OH) + Cl_2^\bullet \rightarrow CH_3CH(OH)(O^\bullet) + 2 Cl^- + H^+$   | $1.3 \cdot 10^4$                   |             |                                  | BR: 33%                              |
| $CH_3CH(OH)(O^\bullet) \rightarrow CH_3C^\bullet(OH)(OH)$                                     |                                    |             |                                  | 10                                   |
| $CH_3C^\bullet(OH)(OH) + O_2 \rightarrow CH_3C(OH)(OH)(OO^\bullet)$                           | $2.0 \cdot 10^9$                   |             |                                  | 2                                    |
| $CH_3CH(OH)(OH) + Cl_2^\bullet \rightarrow CH_3C(OH)(OH)(OO^\bullet) + 2 Cl^- + H^+ - O_2$    | R(296) $4.0 \cdot 10^4$            |             | Jacobi et al., 1996              | 3 - 27                               |
| $CH_3C(OH)(OH)(OO^\bullet) + OH^- \rightarrow CH_3C(OH)(O)(OO^\bullet) + H_2O$                |                                    |             |                                  |                                      |
| $CH_3C(OH)(O)(OO^\bullet) \rightarrow CH_3CO(OH) + O_2^\bullet$                               | $4.0 \cdot 10^9$                   |             |                                  | 5                                    |
| $CH_3C(OH)(OH)(OO^\bullet) + OH^- \rightarrow CH_3CO(OH) + O_2^\bullet + H_2O$                | R(297) $4.0 \cdot 10^9$            |             |                                  | = $k(CH_3CH(OH)(OO^\bullet) + OH^-)$ |

| Reactions                                                                                                                                                      |        | $k_{298}$<br>( $M^{-n+1} s^{-1}$ ) | Ea/R<br>(K) | References                       | Notes                              |
|----------------------------------------------------------------------------------------------------------------------------------------------------------------|--------|------------------------------------|-------------|----------------------------------|------------------------------------|
| $CH_3C(OH)(OH)(OO^*) \rightarrow CH_3CO(OH) + HO_2^*$                                                                                                          | R(298) | $1.0 \cdot 10^6$                   |             |                                  | 17                                 |
| $2 CH_3CO(OO^*) \rightarrow 2 C^*H_3 + 2 CO_2 + O_2$                                                                                                           |        | $1.6 \cdot 10^8$                   |             |                                  |                                    |
| $C^*H_3 + O_2 \rightarrow CH_3(OO^*)$                                                                                                                          |        | $2.0 \cdot 10^9$                   |             |                                  | 2                                  |
| $2 CH_3CO(OO^*) \rightarrow 2 CH_3(OO^*) + 2 CO_2 - O_2$                                                                                                       | R(299) | $1.6 \cdot 10^8$                   | -1600       |                                  | = $k(2 CH_3CH_2(OO^*)) - 29$       |
| $CH_3CO(OO^*) + O_2^{*-} \rightarrow CH_3CO(OO^-) + O_2$                                                                                                       | R(300) | $1.0 \cdot 10^9$                   |             | Schuchmann and Von Sonntag, 1988 | 30                                 |
| <b>Oxidation of Glycolaldehyde</b>                                                                                                                             |        |                                    |             |                                  | 31                                 |
| Pathway 1: $CH_2(OH)CHO + HO^* \rightarrow CH_2(OH)C^*O + H_2O$                                                                                                |        | $1.1 \cdot 10^9$                   |             |                                  | BR: 77% - 32                       |
| $CH_2(OH)C^*O + O_2 \rightarrow CH_2(OH)CO(OO^*)$                                                                                                              |        | $2.0 \cdot 10^9$                   |             |                                  | 2                                  |
| Pathway 2: $CH_2(OH)CHO + HO^* \rightarrow CH^*(OH)CHO + H_2O$                                                                                                 |        | $3.0 \cdot 10^8$                   |             |                                  | BR: 23% - 32                       |
| $CH^*(OH)CHO + O_2 \rightarrow CH(OH)(OO^*)CHO$                                                                                                                |        | $2.0 \cdot 10^9$                   |             |                                  | 2                                  |
| $CH_2(OH)CHO + HO^* \rightarrow 0.77 CH_2(OH)CO(OO^*) + 0.23 CH(OH)(OO^*)CHO + H_2O - O_2$                                                                     | R(301) | $1.4 \cdot 10^9$                   |             |                                  | 33                                 |
| Pathway 1: $CH_2(OH)CHO + NO_3^* \rightarrow CH_2(OH)C^*O + NO_3^- + H^+$                                                                                      |        | $2.4 \cdot 10^6$                   |             |                                  | BR: 77%                            |
| $CH_2(OH)C^*O + O_2 \rightarrow CH_2(OH)CO(OO^*)$                                                                                                              |        | $2.0 \cdot 10^9$                   |             |                                  | 2                                  |
| Pathway 2: $CH_2(OH)CHO + NO_3^* \rightarrow CH^*(OH)CHO + NO_3^- + H^+$                                                                                       |        | $7.0 \cdot 10^5$                   |             |                                  | BR: 23%                            |
| $CH^*(OH)CHO + O_2 \rightarrow CH(OH)(OO^*)CHO$                                                                                                                |        | $2.0 \cdot 10^9$                   |             |                                  | 2                                  |
| $CH_2(OH)CHO + NO_3^* \rightarrow 0.77 CH_2(OH)CO(OO^*) + 0.23 CH(OH)(OO^*)CHO + NO_3^- + H^+ - O_2$                                                           | R(302) | $3.1 \cdot 10^6$                   |             |                                  | = $k(CH_3CHO + NO_3^*) - 3$        |
| Pathway 1: $CH_2(OH)CH(OH)(OH) + HO^* \rightarrow CH_2(OH)C^*(OH)(OH) + H_2O$                                                                                  |        | $3.6 \cdot 10^8$                   |             |                                  | BR: 33% - 34                       |
| $CH_2(OH)C^*(OH)(OH) + O_2 \rightarrow CH_2(OH)C(OH)(OH)(OO^*)$                                                                                                |        | $2.0 \cdot 10^9$                   |             |                                  | 2                                  |
| Pathway 2: $CH_2(OH)CH(OH)(OH) + HO^* \rightarrow CH^*(OH)CH(OH)(OH) + H_2O$                                                                                   |        | $3.1 \cdot 10^8$                   |             |                                  | BR: 28% - 34                       |
| $CH^*(OH)CH(OH)(OH) + O_2 \rightarrow CH(OH)(OO^*)CH(OH)(OH)$                                                                                                  |        | $2.0 \cdot 10^9$                   |             |                                  | 2                                  |
| Pathway 3: $CH_2(OH)CH(OH)(OH) + HO^* \rightarrow CH_2(OH)CH(OH)(O^*) + H_2O$                                                                                  |        | $4.3 \cdot 10^8$                   |             |                                  | BR: 39% - 34                       |
| $CH_2(OH)CH(OH)(O^*) \rightarrow C^*H_2(OH) + CHO(OH)$                                                                                                         |        |                                    |             |                                  | 21 - 22                            |
| $C^*H_2(OH) + O_2 \rightarrow CH_2(OH)(OO^*)$                                                                                                                  |        | $2.0 \cdot 10^9$                   |             |                                  | 2                                  |
| $CH_2(OH)CH(OH)(OH) + HO^* \rightarrow 0.33 CH_2(OH)C(OH)(OH)(OO^*) + 0.28 CH(OH)(OO^*)CH(OH)(OH) + 0.39 CHO(OH) + 0.39 CH_2(OH)(OO^*) + H_2O - O_2$           | R(303) | $1.1 \cdot 10^9$                   |             |                                  | 33                                 |
| Pathway 1: $CH_2(OH)CH(OH)(OH) + NO_3^* \rightarrow CH_2(OH)C^*(OH)(OH) + NO_3^- + H^+$                                                                        |        | $3.6 \cdot 10^5$                   |             |                                  | BR: 33%                            |
| $CH_2(OH)C^*(OH)(OH) + O_2 \rightarrow CH_2(OH)C(OH)(OH)(OO^*)$                                                                                                |        | $2.0 \cdot 10^9$                   |             |                                  | 2                                  |
| Pathway 2: $CH_2(OH)CH(OH)(OH) + NO_3^* \rightarrow CH^*(OH)CH(OH)(OH) + NO_3^- + H^+$                                                                         |        | $3.1 \cdot 10^5$                   |             |                                  | BR: 28%                            |
| $CH^*(OH)CH(OH)(OH) + O_2 \rightarrow CH(OH)(OO^*)CH(OH)(OH)$                                                                                                  |        | $2.0 \cdot 10^9$                   |             |                                  | 2                                  |
| Pathway 3: $CH_2(OH)CH(OH)(OH) + NO_3^* \rightarrow CH_2(OH)CH(OH)(O^*) + NO_3^- + H^+$                                                                        |        | $4.3 \cdot 10^5$                   |             |                                  | BR: 39%                            |
| $CH_2(OH)CH(OH)(O^*) \rightarrow C^*H_2(OH) + CHO(OH)$                                                                                                         |        |                                    |             |                                  | 21 - 22                            |
| $C^*H_2(OH) + O_2 \rightarrow CH_2(OH)(OO^*)$                                                                                                                  |        | $2.0 \cdot 10^9$                   |             |                                  | 2                                  |
| $CH_2(OH)CH(OH)(OH) + NO_3^* \rightarrow 0.33 CH_2(OH)C(OH)(OH)(OO^*) + 0.28 CH(OH)(OO^*)CH(OH)(OH) + 0.39 CHO(OH) + 0.39 CH_2(OH)(OO^*) + NO_3^- + H^+ - O_2$ | R(304) | $1.1 \cdot 10^6$                   |             |                                  | = $k(CH_3CH(OH)(OH) + NO_3^*) - 3$ |
| $CH_2(OH)CO(OO^*) + O_2^{*-} \rightarrow CH_2(OH)CO(OO^-) + O_2$                                                                                               | R(305) | $1.0 \cdot 10^9$                   |             |                                  | = $k(CH_3CO(OO^*) + O_2^{*-})$     |
| $CH_2(OH)C(OH)(OH)(OO^*) + OH^- \rightarrow CH_2(OH)C(OH)(O^-)(OO^*) + H_2O$                                                                                   |        | $4.0 \cdot 10^9$                   |             |                                  |                                    |
| $CH_2(OH)C(OH)(O^-)(OO^*) \rightarrow CH_2(OH)CO(OH) + O_2^{*-}$                                                                                               |        |                                    |             |                                  | 5                                  |
| $CH_2(OH)C(OH)(OH)(OO^*) + OH^- \rightarrow CH_2(OH)CO(OH) + O_2^{*-} + H_2O$                                                                                  | R(306) | $4.0 \cdot 10^9$                   |             |                                  | = $k(CH_3CH(OH)(OO^*) + OH^-)$     |
| $CH_2(OH)C(OH)(OH)(OO^*) \rightarrow CH_2(OH)CO(OH) + HO_2^*$                                                                                                  | R(307) | $1.0 \cdot 10^6$                   |             |                                  | 17                                 |
| $CH(OH)(OO^*)CHO + OH^- \rightarrow CH(O^-)(OO^*)CHO + H_2O$                                                                                                   |        | $4.0 \cdot 10^9$                   |             |                                  |                                    |
| $CH(O^-)(OO^*)CHO \rightarrow CHOCHO + O_2^{*-}$                                                                                                               |        |                                    |             |                                  | 5                                  |
| $CH(OH)(OO^*)CHO + OH^- \rightarrow CHOCHO + O_2^{*-} + H_2O$                                                                                                  | R(308) | $4.0 \cdot 10^9$                   |             |                                  | = $k(CH_3CH(OH)(OO^*) + OH^-)$     |
| $CH(OH)(OO^*)CHO \rightarrow CHOCHO + HO_2^*$                                                                                                                  | R(309) | $1.9 \cdot 10^2$                   |             |                                  | 4                                  |

| Reactions                                                                                                                                        |        | $k_{298}$<br>( $M^{-n+1} s^{-1}$ ) | Ea/R<br>(K) | References            | Notes                             |
|--------------------------------------------------------------------------------------------------------------------------------------------------|--------|------------------------------------|-------------|-----------------------|-----------------------------------|
| $CH(OH)(OO^*)CH(OH)(OH) + OH^- \rightarrow CH(O^-)(OO^*)CH(OH)(OH) + H_2O$                                                                       |        | $4.0 \cdot 10^9$                   |             |                       |                                   |
| $CH(O^-)(OO^*)CH(OH)(OH) \rightarrow CHOCH(OH)(OH) + O_2^{\cdot-}$                                                                               |        |                                    |             |                       | 5                                 |
| $CH(OH)(OO^*)CH(OH)(OH) + OH^- \rightarrow CHOCH(OH)(OH) + O_2^{\cdot-} + H_2O$                                                                  | R(310) | $4.0 \cdot 10^9$                   |             |                       | = $k(CH_3CH(OH)(OO^*) + OH^-)$    |
| $CH(OH)(OO^*)CH(OH)(OH) \rightarrow CHOCH(OH)(OH) + HO_2^{\cdot}$                                                                                | R(311) | $1.9 \cdot 10^2$                   |             |                       | 4                                 |
| <b>Oxidation of Glyoxal</b>                                                                                                                      |        |                                    |             |                       |                                   |
| 35                                                                                                                                               |        |                                    |             |                       |                                   |
| Pathway 1: $CH(OH)(OH)CH(OH)(OH) + HO^{\cdot} \rightarrow CH(OH)(OH)C^*(OH)(OH) + H_2O$                                                          |        | $3.0 \cdot 10^8$                   |             |                       | BR: 27% - 36                      |
| $CH(OH)(OH)C^*(OH)(OH) + O_2 \rightarrow CH(OH)(OH)C(OH)(OH)(OO^*)$                                                                              |        | $1.2 \cdot 10^9$                   |             | Schaefer et al., 2014 |                                   |
| Pathway 2: $CH(OH)(OH)CH(OH)(OH) + HO^{\cdot} \rightarrow CH(OH)(OH)CH(OH)(O^{\cdot}) + H_2O$                                                    |        | $8.0 \cdot 10^8$                   |             |                       | BR: 73% - 36                      |
| $CH(OH)(OH)CH(OH)(O^{\cdot}) \rightarrow C^*H(OH)(OH) + CHO(OH)$                                                                                 |        |                                    |             |                       | 21 - 22                           |
| $C^*H(OH)(OH) + O_2 \rightarrow CH(OH)(OH)(OO^*)$                                                                                                |        | $2.0 \cdot 10^9$                   |             |                       | 2                                 |
| $CH(OH)(OH)CH(OH)(OH) + HO^{\cdot} \rightarrow 0.27 CH(OH)(OH)C(OH)(OH)(OO^*) + 0.73 CHO(OH) + 0.73 CH(OH)(OH)(OO^*) + H_2O - O_2$               | R(312) | $1.1 \cdot 10^9$                   | 1516        | Buxton et al., 1997   |                                   |
| Pathway 1: $CH(OH)(OH)CH(OH)(OH) + NO_3^{\cdot} \rightarrow CH(OH)(OH)C^*(OH)(OH) + NO_3^- + H^+$                                                |        | $7.3 \cdot 10^5$                   |             |                       | BR: 27%                           |
| $CH(OH)(OH)C^*(OH)(OH) + O_2 \rightarrow CH(OH)(OH)C(OH)(OH)(OO^*)$                                                                              |        | $1.2 \cdot 10^9$                   |             | Schaefer et al., 2014 |                                   |
| Pathway 2: $CH(OH)(OH)CH(OH)(OH) + NO_3^{\cdot} \rightarrow CH(OH)(OH)CH(OH)(O^{\cdot}) + NO_3^- + H^+$                                          |        | $2.7 \cdot 10^5$                   |             |                       | BR: 73%                           |
| $CH(OH)(OH)CH(OH)(O^{\cdot}) \rightarrow C^*H(OH)(OH) + CHO(OH)$                                                                                 |        |                                    |             |                       | 21 - 22                           |
| $C^*H(OH)(OH) + O_2 \rightarrow CH(OH)(OH)(OO^*)$                                                                                                |        | $2.0 \cdot 10^9$                   |             |                       | 2                                 |
| $CH(OH)(OH)CH(OH)(OH) + NO_3^{\cdot} \rightarrow 0.27 CH(OH)(OH)C(OH)(OH)(OO^*) + 0.73 CHO(OH) + 0.73 CH(OH)(OH)(OO^*) + NO_3^- + H^+ - O_2$     | R(313) | $1.0 \cdot 10^6$                   |             |                       | 3 - 37                            |
| Pathway 1: $CH(OH)(OH)CH(OH)(OH) + SO_4^{\cdot-} \rightarrow CH(OH)(OH)C^*(OH)(OH) + SO_4^{2-} + H^+$                                            |        | $1.8 \cdot 10^7$                   |             |                       | BR: 27%                           |
| $CH(OH)(OH)C^*(OH)(OH) + O_2 \rightarrow CH(OH)(OH)C(OH)(OH)(OO^*)$                                                                              |        | $1.2 \cdot 10^9$                   |             | Schaefer et al., 2014 |                                   |
| Pathway 2: $CH(OH)(OH)CH(OH)(OH) + SO_4^{\cdot-} \rightarrow CH(OH)(OH)CH(OH)(O^{\cdot}) + SO_4^{2-} + H^+$                                      |        | $6.0 \cdot 10^6$                   |             |                       | BR: 73%                           |
| $CH(OH)(OH)CH(OH)(O^{\cdot}) \rightarrow C^*H(OH)(OH) + CHO(OH)$                                                                                 |        |                                    |             |                       | 21 - 22                           |
| $C^*H(OH)(OH) + O_2 \rightarrow CH(OH)(OH)(OO^*)$                                                                                                |        | $2.0 \cdot 10^9$                   |             |                       | 2                                 |
| $CH(OH)(OH)CH(OH)(OH) + SO_4^{\cdot-} \rightarrow 0.27 CH(OH)(OH)C(OH)(OH)(OO^*) + 0.73 CHO(OH) + 0.73 CH(OH)(OH)(OO^*) + SO_4^{2-} + H^+ - O_2$ | R(314) | $2.4 \cdot 10^7$                   |             | George et al., 2001   | 3                                 |
| $CH(OH)(OH)C(OH)(OH)(OO^*) + OH^- \rightarrow CH(OH)(OH)C(OH)(O^-)(OO^*) + H_2O$                                                                 |        | $4.0 \cdot 10^9$                   |             |                       |                                   |
| $CH(OH)(OH)C(OH)(O^-)(OO^*) \rightarrow CH(OH)(OH)CO(OH) + O_2^{\cdot-}$                                                                         |        |                                    |             |                       | 5                                 |
| $CH(OH)(OH)C(OH)(OH)(OO^*) + OH^- \rightarrow CH(OH)(OH)CO(OH) + O_2^{\cdot-} + H_2O$                                                            | R(315) | $4.0 \cdot 10^9$                   |             |                       | = $k(CH_3CH(OH)(OO^*) + OH^-)$    |
| $CH(OH)(OH)C(OH)(OH)(OO^*) \rightarrow CH(OH)(OH)CO(OH) + HO_2^{\cdot}$                                                                          | R(316) | $1.0 \cdot 10^6$                   |             |                       | 17                                |
| <b>Acetic acid formation by Peracetic Acid oxidation</b>                                                                                         |        |                                    |             |                       |                                   |
| $CH_3CO(OH) + H_2O_2 + H^+ \rightarrow CH_3CO(OOH) + H_2O + H^+$                                                                                 | R(317) | $3.1 \cdot 10^{-4}$                | 5235        |                       | = $k(CH(OH) + H_2O_2 + H^+) - 38$ |
| $CH_3CO(OOH) + H_2O + H^+ \rightarrow CH_3CO(OH) + H_2O_2 + H^+$                                                                                 | R(318) | $3.8 \cdot 10^{-4}$                |             |                       | = $k(CH(OOH) + H_2O + H^+) - 38$  |
| $CH_3CO(OOH) + HSO_3^- \rightarrow CH_3CO(OH) + H_2SO_4 - H^+$                                                                                   | R(319) | $4.8 \cdot 10^7$                   | 3990        | Lind et al., 1987     |                                   |
| <b>Glycolic acid formation by Hydroxyperacetic Acid oxidation</b>                                                                                |        |                                    |             |                       |                                   |
| $CH_2(OH)CO(OH) + H_2O_2 + H^+ \rightarrow CH_2(OH)CO(OOH) + H_2O + H^+$                                                                         | R(320) | $3.1 \cdot 10^{-4}$                | 5235        |                       | = $k(CH(OH) + H_2O_2 + H^+) - 39$ |
| $CH_2(OH)CO(OOH) + H_2O + H^+ \rightarrow CH_2(OH)CO(OH) + H_2O_2 + H^+$                                                                         | R(321) | $3.8 \cdot 10^{-4}$                |             |                       | = $k(CH(OOH) + H_2O + H^+) - 39$  |
| <b>Oxidation of Acetic Acid</b>                                                                                                                  |        |                                    |             |                       |                                   |
| $CH_3CO(OH) + HO^{\cdot} \rightarrow C^*H_2CO(OH) + H_2O$                                                                                        |        | $1.5 \cdot 10^7$                   | 1330        |                       |                                   |
| $C^*H_2CO(OH) + O_2 \rightarrow CH_2(OO^*)CO(OH)$                                                                                                |        | $2.0 \cdot 10^9$                   |             |                       | 2                                 |
| $CH_3CO(OH) + HO^{\cdot} \rightarrow CH_2(OO^*)CO(OH) + H_2O - O_2$                                                                              | R(322) | $1.5 \cdot 10^7$                   | 1330        | Chin and Wine, 1994   |                                   |



| Reactions                                                                                                           |        | $k_{298}$<br>( $M^{-n+1} s^{-1}$ ) | Ea/R<br>(K) | References              | Notes                                                                                                    |
|---------------------------------------------------------------------------------------------------------------------|--------|------------------------------------|-------------|-------------------------|----------------------------------------------------------------------------------------------------------|
| $CH_3CO(O^\bullet) + HO^\bullet \rightarrow C^*H_2CO(O^\bullet) + H_2O$                                             |        | $1.0 \cdot 10^8$                   | 1800        |                         |                                                                                                          |
| $C^*H_2CO(O^\bullet) + O_2 \rightarrow CH_2(OO^\bullet)CO(O^\bullet)$                                               |        | $2.0 \cdot 10^9$                   |             |                         | 2                                                                                                        |
| $CH_3CO(O^\bullet) + HO^\bullet \rightarrow CH_2(OO^\bullet)CO(O^\bullet) + H_2O - O_2$                             | R(323) | $1.0 \cdot 10^8$                   | 1800        | Fisher and Hamill, 1973 |                                                                                                          |
| $CH_3CO(OH) + NO_3^\bullet \rightarrow C^*H_2CO(OH) + NO_3^- + H^+$                                                 |        | $1.3 \cdot 10^4$                   | 3800        |                         |                                                                                                          |
| $C^*H_2CO(OH) + O_2 \rightarrow CH_2(OO^\bullet)CO(OH)$                                                             |        | $2.0 \cdot 10^9$                   |             |                         | 2                                                                                                        |
| $CH_3CO(OH) + NO_3^\bullet \rightarrow CH_2(OO^\bullet)CO(OH) + NO_3^- + H^+ - O_2$                                 | R(324) | $1.3 \cdot 10^4$                   | 3800        | Exner et al., 1994      |                                                                                                          |
| $CH_3CO(O^\bullet) + NO_3^\bullet \rightarrow C^*H_2CO(O^\bullet) + NO_3^- + H^+$                                   |        | $2.3 \cdot 10^6$                   | 3800        |                         |                                                                                                          |
| $C^*H_2CO(O^\bullet) + O_2 \rightarrow CH_2(OO^\bullet)CO(O^\bullet)$                                               |        |                                    |             |                         | 2                                                                                                        |
| $CH_3CO(O^\bullet) + NO_3^\bullet \rightarrow CH_2(OO^\bullet)CO(O^\bullet) + NO_3^- + H^+ - O_2$                   | R(325) | $2.3 \cdot 10^6$                   | 3800        | Exner et al., 1994      |                                                                                                          |
| $CH_3CO(O^\bullet) + SO_4^{\bullet-} \rightarrow C^*H_2CO(O^\bullet) + SO_4^{2-} + H^+$                             |        | $5.1 \cdot 10^6$                   |             |                         |                                                                                                          |
| $C^*H_2CO(O^\bullet) + O_2 \rightarrow CH_2(OO^\bullet)CO(O^\bullet)$                                               |        | $2.0 \cdot 10^9$                   |             |                         | 2                                                                                                        |
| $CH_3CO(O^\bullet) + SO_4^{\bullet-} \rightarrow CH_2(OO^\bullet)CO(O^\bullet) + SO_4^{2-} + H^+ - O_2$             | R(326) | $5.1 \cdot 10^6$                   |             | Huie and Clifton, 1990  |                                                                                                          |
| $CH_3CO(OH) + Cl_2^{\bullet-} \rightarrow C^*H_2CO(OH) + 2 Cl^- + H^+$                                              |        | $1.5 \cdot 10^3$                   | 4930        |                         |                                                                                                          |
| $C^*H_2CO(OH) + O_2 \rightarrow CH_2(OO^\bullet)CO(OH)$                                                             |        | $2.0 \cdot 10^9$                   |             |                         | 2                                                                                                        |
| $CH_3CO(OH) + Cl_2^{\bullet-} \rightarrow CH_2(OO^\bullet)CO(OH) + 2 Cl^- + H^+ - O_2$                              | R(327) | $1.5 \cdot 10^3$                   | 4930        | Jacobi et al., 1999     |                                                                                                          |
| $CH_3CO(O^\bullet) + Cl_2^{\bullet-} \rightarrow C^*H_2CO(O^\bullet) + 2 Cl^- + H^+$                                |        | $2.6 \cdot 10^6$                   | 4800        |                         |                                                                                                          |
| $C^*H_2CO(O^\bullet) + O_2 \rightarrow CH_2(OO^\bullet)CO(O^\bullet)$                                               |        | $2.0 \cdot 10^9$                   |             |                         | 2                                                                                                        |
| $CH_3CO(O^\bullet) + Cl_2^{\bullet-} \rightarrow CH_2(OO^\bullet)CO(O^\bullet) + 2 Cl^- + H^+ - O_2$                | R(328) | $2.6 \cdot 10^6$                   | 4800        | Jacobi et al., 1996     |                                                                                                          |
| $CH_3CO(O^\bullet) + CO_3^{\bullet-} \rightarrow C^*H_2CO(O^\bullet) + CO_3^{2-} + H^+$                             |        | $5.8 \cdot 10^2$                   |             |                         |                                                                                                          |
| $C^*H_2CO(O^\bullet) + O_2 \rightarrow CH_2(OO^\bullet)CO(O^\bullet)$                                               |        | $2.0 \cdot 10^9$                   |             |                         | 2                                                                                                        |
| $CH_3CO(O^\bullet) + CO_3^{\bullet-} \rightarrow CH_2(OO^\bullet)CO(O^\bullet) + CO_3^{2-} + H^+ - O_2$             | R(329) | $5.8 \cdot 10^2$                   |             | Zellner et al., 1996    |                                                                                                          |
| <b>Oxidation of Ethyl hydroperoxide (EHP)</b>                                                                       |        |                                    |             |                         |                                                                                                          |
| $CH_3CH_2(OOH) + Fe^{2+} \rightarrow CH_3CH_2(O^\bullet) + Fe^{3+} + OH^-$                                          |        | $2.4 \cdot 10^1$                   |             |                         |                                                                                                          |
| $CH_3CH_2(O^\bullet) \rightarrow CH_3C^*H(OH)$                                                                      |        | $5.0 \cdot 10^5$                   |             |                         | 40 - 22                                                                                                  |
| $CH_3C^*H(OH) + O_2 \rightarrow CH_3CH(OH)(OO^\bullet)$                                                             |        | $4.6 \cdot 10^9$                   |             | Adams and Willson, 1969 |                                                                                                          |
| $CH_3CH_2(OOH) + Fe^{2+} \rightarrow CH_3CH(OH)(OO^\bullet) + Fe^{3+} + OH^- - O_2$                                 | R(330) | $2.4 \cdot 10^1$                   |             | Chevallier et al., 2004 |                                                                                                          |
| Pathway 1: $CH_3CH_2(OOH) + HO^\bullet \rightarrow CH_3CH_2(OO^\bullet) + H_2O$                                     |        | $4.6 \cdot 10^8$                   |             | Monod et al., 2007      | BR: 80%                                                                                                  |
| Pathway 2: $CH_3CH_2(OOH) + HO^\bullet \rightarrow CH_3C^*H(OOH) + H_2O$                                            |        | $1.2 \cdot 10^8$                   |             | Monod et al., 2007      | BR: 20%                                                                                                  |
| $CH_3C^*H(OOH) + O_2 \rightarrow CH_3CH(OOH)(OO^\bullet)$                                                           |        | $2.0 \cdot 10^9$                   |             |                         | 2                                                                                                        |
| $CH_3CH_2(OOH) + HO^\bullet \rightarrow 0.80 CH_3CH_2(OO^\bullet) + 0.20 CH_3CH(OOH)(OO^\bullet) + H_2O - 0.20 O_2$ | R(331) | $5.8 \cdot 10^8$                   |             | Monod et al., 2007      |                                                                                                          |
| $CH_3CH_2(OOH) + hv \rightarrow CH_3CH_2(O^\bullet) + HO^\bullet$                                                   |        | Calculated                         |             |                         |                                                                                                          |
| $CH_3CH_2(O^\bullet) + H_2O \rightarrow CH_3C^*H(OH) + H_2O$                                                        |        | $5.0 \cdot 10^5$                   |             |                         | 40                                                                                                       |
| $CH_3C^*H(OH) + O_2 \rightarrow CH_3CH(OH)(OO^\bullet)$                                                             |        | $4.6 \cdot 10^9$                   |             | Adams and Willson, 1969 |                                                                                                          |
| $CH_3CH_2(OOH) + hv \rightarrow CH_3CH(OH)(OO^\bullet) + HO^\bullet - O_2$                                          | R(332) | Calculated                         |             |                         | = J(H <sub>2</sub> O <sub>2</sub> )                                                                      |
| $CH_3CH(OOH)(OO^\bullet) + OH^- \rightarrow CH_3CH(OO^-)(OO^\bullet) + H_2O$                                        |        | $4.0 \cdot 10^9$                   |             |                         |                                                                                                          |
| $CH_3CH(OO^-)(OO^\bullet) \rightarrow CH_3CO(OH) + O_2^{\bullet-}$                                                  |        |                                    |             |                         | 11                                                                                                       |
| $CH_3CH(OOH)(OO^\bullet) + OH^- \rightarrow CH_3CO(OH) + O_2^{\bullet-} + H_2O$                                     | R(333) | $4.0 \cdot 10^9$                   |             |                         | = k(CH <sub>3</sub> CH(OH)(OO <sup>•</sup> ) + OH <sup>-</sup> ) - 12                                    |
| $CH_3CH(OOH)(OO^\bullet) \rightarrow CH_3CO(OH) + HO_2^\bullet$                                                     | R(334) | $1.9 \cdot 10^2$                   |             |                         | = k(CH <sub>3</sub> CH(OH)(OO <sup>•</sup> ) → CH <sub>3</sub> CHO + HO <sub>2</sub> <sup>•</sup> ) - 41 |
| <b>Ethylperoxyl radical self-reaction</b>                                                                           |        |                                    |             |                         |                                                                                                          |
| Pathway 1: $2 CH_3CH_2(OO^\bullet) \rightarrow 2 CH_3CHO + H_2O_2$                                                  |        | $3.0 \cdot 10^7$                   |             |                         | BR: 20% - 42                                                                                             |
| Pathway 2: $2 CH_3CH_2(OO^\bullet) \rightarrow 2 CH_3CH_2(O^\bullet) + O_2$                                         |        | $1.3 \cdot 10^8$                   |             |                         | BR: 80% - 42                                                                                             |
| $CH_3CH_2(O^\bullet) \rightarrow CH_3C^*H(OH)$                                                                      |        |                                    |             |                         | 10 - 22                                                                                                  |
| $CH_3C^*H(OH) + O_2 \rightarrow CH_3CH(OH)(OO^\bullet)$                                                             |        | $4.6 \cdot 10^9$                   |             | Adams and Willson, 1969 |                                                                                                          |

| Reactions                                                                                                                                                                                                                             |        | $k_{298}$<br>( $M^{-n+1} s^{-1}$ ) | Ea/R<br>(K) | References               | Notes                                                                      |
|---------------------------------------------------------------------------------------------------------------------------------------------------------------------------------------------------------------------------------------|--------|------------------------------------|-------------|--------------------------|----------------------------------------------------------------------------|
| $2 CH_3CH_2(OO^{\bullet}) \rightarrow 0.40 CH_3CHO + 1.60 CH_3CH(OH)(OO^{\bullet}) + 0.20 H_2O_2 - 0.80 O_2$                                                                                                                          | R(335) | $1.6 \cdot 10^8$                   | -1600       | Herrmann et al., 1999    |                                                                            |
| <b>Oxidation of Acetic Acid Peroxyl radicals</b>                                                                                                                                                                                      |        |                                    |             |                          |                                                                            |
| $CH_2(OO^{\bullet})CO(OH) + HO_2^{\bullet} \rightarrow CH_2(OOH)CO(OH) + O_2$                                                                                                                                                         | R(336) | $8.3 \cdot 10^5$                   | 2700        |                          | = $k(HO_2^{\bullet} + HO_2^{\bullet})$                                     |
| $CH_2(OO^{\bullet})CO(OH) + O_2^{\bullet-} \rightarrow CH_2(OOH)CO(OH) + O_2 - H^+$                                                                                                                                                   | R(337) | $9.6 \cdot 10^7$                   | 910         |                          | = $k(HO_2^{\bullet} + O_2^{\bullet-})$                                     |
| $CH_2(OO^{\bullet})CO(OH) + HSO_3^{\bullet-} \rightarrow CH_2(OOH)CO(OH) + SO_3^{\bullet-}$                                                                                                                                           | R(338) | $5.0 \cdot 10^5$                   |             |                          | = $k(CH_3(OO^{\bullet}) + HSO_3^{\bullet-})$                               |
| Pathway 1: $2 CH_2(OO^{\bullet})CO(OH) \rightarrow 2 CHOCO(OH) + H_2O_2$                                                                                                                                                              |        | $2.3 \cdot 10^7$                   |             |                          | BR: 30% - 43                                                               |
| Pathway 2: $2 CH_2(OO^{\bullet})CO(OH) (+ 2 H_2O) \rightarrow 2 CH_2O + 2 CO_2 + H_2O_2 + 2 H_2O$                                                                                                                                     |        | $2.3 \cdot 10^7$                   |             |                          | BR: 30% - 43                                                               |
| Pathway 3: $2 CH_2(OO^{\bullet})CO(OH) \rightarrow CHOCO(OH) + CH_2(OH)CO(OH) + O_2$                                                                                                                                                  |        | $2.3 \cdot 10^7$                   |             |                          | BR: 30% - 43                                                               |
| Pathway 4: $2 CH_2(OO^{\bullet})CO(OH) \rightarrow 2 CH_2(O^{\bullet})CO(OH) + O_2$                                                                                                                                                   |        | $6.0 \cdot 10^6$                   |             |                          | BR: 10% - 43                                                               |
| $CH_2(O^{\bullet})CO(OH) \rightarrow C^{\bullet}H(OH)CO(OH)$                                                                                                                                                                          |        |                                    |             |                          | 10                                                                         |
| $C^{\bullet}H(OH)CO(OH) + O_2 \rightarrow CH(OH)(OO^{\bullet})CO(OH)$                                                                                                                                                                 |        | $2.0 \cdot 10^9$                   |             |                          | 2                                                                          |
| $2 CH_2(OO^{\bullet})CO(OH) \rightarrow 0.90 CHOCO(OH) + 0.30 CH_2(OH)CO(OH) + 0.20 CH(OH)(OO^{\bullet})CO(OH) + 0.60 CH_2O + 0.60 CO_2 + 0.60 H_2O_2 + 0.20 O_2$                                                                     | R(339) | $7.5 \cdot 10^7$                   |             |                          | = $k(2 CH_2(OO^{\bullet})CO(O^{\bullet})) - 29$                            |
| $CH_2(OO^{\bullet})CO(O^{\bullet}) + HO_2^{\bullet} \rightarrow CH_2(OOH)CO(O^{\bullet}) + O_2$                                                                                                                                       | R(340) | $8.3 \cdot 10^5$                   | 2700        |                          | = $k(HO_2^{\bullet} + HO_2^{\bullet})$                                     |
| $CH_2(OO^{\bullet})CO(O^{\bullet}) + O_2^{\bullet-} \rightarrow CH_2(OOH)CO(O^{\bullet}) + O_2 - H^+$                                                                                                                                 | R(341) | $9.6 \cdot 10^7$                   | 910         |                          | = $k(HO_2^{\bullet} + O_2^{\bullet-})$                                     |
| $CH_2(OO^{\bullet})CO(O^{\bullet}) + HSO_3^{\bullet-} \rightarrow CH_2(OOH)CO(O^{\bullet}) + SO_3^{\bullet-}$                                                                                                                         | R(342) | $5.0 \cdot 10^5$                   |             |                          | = $k(CH_3(OO^{\bullet}) + HSO_3^{\bullet-})$                               |
| Pathway 1: $2 CH_2(OO^{\bullet})CO(O^{\bullet}) \rightarrow 2 CHOCO(O^{\bullet}) + H_2O_2$                                                                                                                                            |        | $2.3 \cdot 10^7$                   |             | Schuchmann et al., 1985  | BR: 30%                                                                    |
| Pathway 2: $2 CH_2(OO^{\bullet})CO(O^{\bullet}) (+ 2 H_2O) \rightarrow 2 CH_2O + 2 CO_2 + H_2O_2 + 2 OH^{\bullet}$                                                                                                                    |        | $2.3 \cdot 10^7$                   |             | Schuchmann et al., 1985  | BR: 30%                                                                    |
| Pathway 3: $2 CH_2(OO^{\bullet})CO(O^{\bullet}) \rightarrow CHOCO(O^{\bullet}) + CH_2(OH)CO(O^{\bullet}) + O_2$                                                                                                                       |        | $2.3 \cdot 10^7$                   |             | Schuchmann et al., 1985  | BR: 30%                                                                    |
| Pathway 4: $2 CH_2(OO^{\bullet})CO(O^{\bullet}) \rightarrow 2 CH_2(O^{\bullet})CO(O^{\bullet}) + O_2$                                                                                                                                 |        | $6.0 \cdot 10^6$                   |             | Schuchmann et al., 1985  | BR: 10%                                                                    |
| $CH_2(O^{\bullet})CO(O^{\bullet}) \rightarrow C^{\bullet}H(OH)CO(O^{\bullet})$                                                                                                                                                        |        |                                    |             |                          | 10                                                                         |
| $C^{\bullet}H(OH)CO(O^{\bullet}) + O_2 \rightarrow CH(OH)(OO^{\bullet})CO(O^{\bullet})$                                                                                                                                               |        | $2.0 \cdot 10^9$                   |             |                          | 2                                                                          |
| $2 CH_2(OO^{\bullet})CO(O^{\bullet}) \rightarrow 0.90 CHOCO(O^{\bullet}) + 0.30 CH_2(OH)CO(O^{\bullet}) + 0.20 CH(OH)(OO^{\bullet})CO(O^{\bullet}) + 0.60 CH_2O + 0.60 CO_2 + 0.60 H_2O_2 + 0.60 OH^{\bullet} + 0.20 O_2 - 0.60 H_2O$ | R(343) | $7.5 \cdot 10^7$                   |             | Schuchmann et al., 1985  | 44                                                                         |
| <b>Oxidation of Oxalic acid</b>                                                                                                                                                                                                       |        |                                    |             |                          | 45                                                                         |
| $CO(OH)CO(O^{\bullet}) + HO^{\bullet} \rightarrow C_2O_4^{\bullet-} + H_2O$                                                                                                                                                           | R(344) | $1.9 \cdot 10^8$                   | 2800        | Ervens et al., 2003      |                                                                            |
| $CO(O^{\bullet})CO(O^{\bullet}) + HO^{\bullet} \rightarrow C_2O_4^{\bullet-} + OH^{\bullet}$                                                                                                                                          | R(345) | $1.6 \cdot 10^8$                   | 4300        | Ervens et al., 2003      |                                                                            |
| $CO(OH)CO(O^{\bullet}) + SO_4^{\bullet-} \rightarrow C_2O_4^{\bullet-} + SO_4^{2-} + H^+$                                                                                                                                             | R(346) | $1.7 \cdot 10^6$                   |             | Grgić et al., 2007       |                                                                            |
| $CO(O^{\bullet})CO(O^{\bullet}) + SO_4^{\bullet-} \rightarrow C_2O_4^{\bullet-} + SO_4^{2-}$                                                                                                                                          | R(347) | $1.3 \cdot 10^7$                   |             | Grgić et al., 2007       |                                                                            |
| $C_2O_4^{\bullet-} + O_2 \rightarrow CO_2^{\bullet-} + CO_2$                                                                                                                                                                          |        | $2.0 \cdot 10^6$                   |             | Mulazzani et al., 1986   |                                                                            |
| $CO_2^{\bullet-} + O_2 \rightarrow CO_2 + O_2^{\bullet-}$                                                                                                                                                                             |        | $2.4 \cdot 10^9$                   |             | Hislop and Bolton, 1999  |                                                                            |
| $C_2O_4^{\bullet-} + O_2 \rightarrow 2 CO_2 + O_2^{\bullet-}$                                                                                                                                                                         | R(348) | $2.4 \cdot 10^9$                   |             | Hislop and Bolton, 1999  |                                                                            |
| $CO(O^{\bullet})CO(O^{\bullet}) + Fe^{3+} \rightarrow [Fe(C_2O_4)]^+$                                                                                                                                                                 | R(349) | $7.5 \cdot 10^6$                   |             |                          | 46                                                                         |
| $[Fe(C_2O_4)]^+ \rightarrow CO(O^{\bullet})CO(O^{\bullet}) + Fe^{3+}$                                                                                                                                                                 | R(350) | $3.0 \cdot 10^{-3}$                |             | Moorhead and Sutin, 1966 | 47                                                                         |
| $CO(O^{\bullet})CO(O^{\bullet}) + [Fe(C_2O_4)]^+ \rightarrow [Fe(C_2O_4)_2]^-$                                                                                                                                                        | R(351) | $1.9 \cdot 10^4$                   |             |                          | 46                                                                         |
| $[Fe(C_2O_4)_2]^- \rightarrow CO(O^{\bullet})CO(O^{\bullet}) + [Fe(C_2O_4)]^+$                                                                                                                                                        | R(352) | $3.0 \cdot 10^{-3}$                |             |                          | = $k([Fe(C_2O_4)]^+ \rightarrow CO(O^{\bullet})CO(O^{\bullet}) + Fe^{3+})$ |
| $CO(O^{\bullet})CO(O^{\bullet}) + [Fe(C_2O_4)_2]^- \rightarrow [Fe(C_2O_4)_3]^{3-}$                                                                                                                                                   | R(353) | $4.8 \cdot 10^1$                   |             |                          | 46                                                                         |
| $[Fe(C_2O_4)_3]^{3-} \rightarrow CO(O^{\bullet})CO(O^{\bullet}) + [Fe(C_2O_4)_2]^-$                                                                                                                                                   | R(354) | $3.0 \cdot 10^{-3}$                |             |                          | = $k([Fe(C_2O_4)]^+ \rightarrow CO(O^{\bullet})CO(O^{\bullet}) + Fe^{3+})$ |

| Reactions                                                                                                                                    |        | $k_{298}$<br>( $M^{-n+1} s^{-1}$ ) | Ea/R<br>(K) | References                 | Notes                                                                                |
|----------------------------------------------------------------------------------------------------------------------------------------------|--------|------------------------------------|-------------|----------------------------|--------------------------------------------------------------------------------------|
| $[Fe(C_2O_4)]^+ + hv \rightarrow Fe^{2+} + C_2O_4^{\bullet-}$                                                                                | R(355) | Calculated                         |             | Long et al., 2013          |                                                                                      |
| $[Fe(C_2O_4)_2]^- + hv \rightarrow Fe^{2+} + CO(O^-)CO(O^-) + C_2O_4^{\bullet-}$                                                             | R(356) | Calculated                         |             | Faust and Zepp, 1993       |                                                                                      |
| $[Fe(C_2O_4)_3]^{3-} + hv \rightarrow Fe^{2+} + 2 CO(O^-)CO(O^-) + C_2O_4^{\bullet-}$                                                        | R(357) | Calculated                         |             | Faust and Zepp, 1993       |                                                                                      |
| <b>Oxidation of 2-hydroperoxyacetic Acid</b>                                                                                                 |        |                                    |             |                            |                                                                                      |
| Pathway 1: $CH_2(OOH)CO(OH) + HO^{\bullet} \rightarrow CH_2(OO^{\bullet})CO(OH) + H_2O$                                                      |        | 4.6 10 <sup>8</sup>                |             |                            | BR: 80% - 48                                                                         |
| Pathway 2: $CH_2(OOH)CO(OH) + HO^{\bullet} \rightarrow C^{\bullet}H(OOH)CO(OH) + H_2O$                                                       |        | 1.2 10 <sup>8</sup>                |             |                            | BR: 20% - 48                                                                         |
| $C^{\bullet}H(OOH)CO(OH) + O_2 \rightarrow CH(OOH)(OO^{\bullet})CO(OH)$                                                                      |        | 2.0 10 <sup>9</sup>                |             |                            | 2                                                                                    |
| $CH_2(OOH)CO(OH) + HO^{\bullet} \rightarrow 0.80 CH_2(OO^{\bullet})CO(OH) + 0.20 CH(OOH)(OO^{\bullet})CO(OH) + H_2O - 0.20 O_2$              | R(358) | 5.8 10 <sup>8</sup>                |             |                            | = k(CH <sub>3</sub> CH <sub>2</sub> (OOH) + HO <sup>•</sup> )                        |
| Pathway 1: $CH_2(OOH)CO(OH) + NO_3^{\bullet} \rightarrow CH_2(OO^{\bullet})CO(OH) + NO_3^- + H^+$                                            |        | 1.4 10 <sup>6</sup>                |             |                            | BR: 80%                                                                              |
| Pathway 2: $CH_2(OOH)CO(OH) + NO_3^{\bullet} \rightarrow C^{\bullet}H(OOH)CO(OH) + NO_3^- + H^+$                                             |        | 3.0 10 <sup>5</sup>                |             |                            | BR: 20%                                                                              |
| $C^{\bullet}H(OOH)CO(OH) + O_2 \rightarrow CH(OOH)(OO^{\bullet})CO(OH)$                                                                      |        | 2.0 10 <sup>9</sup>                |             |                            | 2                                                                                    |
| $CH_2(OOH)CO(OH) + NO_3^{\bullet} \rightarrow 0.80 CH_2(OO^{\bullet})CO(OH) + 0.20 CH(OOH)(OO^{\bullet})CO(OH) + NO_3^- + H^+ - 0.20 O_2$    | R(359) | 1.7 10 <sup>6</sup>                |             | Herrmann and Zellner, 1998 | 3                                                                                    |
| $CH_2(OOH)CO(OH) + Fe^{2+} \rightarrow CH_2(O^{\bullet})CO(OH) + Fe^{3+} + OH^-$                                                             |        | 2.4 10 <sup>1</sup>                |             |                            |                                                                                      |
| $CH_2(O^{\bullet})CO(OH) \rightarrow CH_2O + C^{\bullet}O(OH)$                                                                               |        |                                    |             |                            | 21 - 22                                                                              |
| $C^{\bullet}O(OH) + O_2 \rightarrow CO(OH)(OO^{\bullet})$                                                                                    |        | 2.0 10 <sup>9</sup>                |             |                            | 2                                                                                    |
| $CH_2(OOH)CO(OH) + Fe^{2+} \rightarrow CH_2O + CO(OH)(OO^{\bullet}) + Fe^{3+} + OH^- - O_2$                                                  | R(360) | 2.4 10 <sup>1</sup>                |             |                            | = k(CH <sub>3</sub> CH <sub>2</sub> (OOH) + Fe <sup>2+</sup> )                       |
| $CH_2(OOH)CO(OH) + hv \rightarrow CH_2(O^{\bullet})CO(OH) + HO^{\bullet}$                                                                    |        | Calculated                         |             |                            |                                                                                      |
| $CH_2(O^{\bullet})CO(OH) \rightarrow CH_2O + C^{\bullet}O(OH)$                                                                               |        |                                    |             |                            | 21 - 22                                                                              |
| $C^{\bullet}O(OH) + O_2 \rightarrow CO(OH)(OO^{\bullet})$                                                                                    |        | 2.0 10 <sup>9</sup>                |             |                            | 2                                                                                    |
| $CH_2(OOH)CO(OH) + hv \rightarrow CH_2O + CO(OH)(OO^{\bullet}) + HO^{\bullet} - O_2$                                                         | R(361) | Calculated                         |             |                            | = J(CH <sub>3</sub> CH <sub>2</sub> (OOH) + hv)                                      |
| Pathway 1: $CH_2(OOH)CO(O^-) + HO^{\bullet} \rightarrow CH_2(OO^{\bullet})CO(O^-) + H_2O$                                                    |        | 4.6 10 <sup>8</sup>                |             |                            | BR: 80% - 48                                                                         |
| Pathway 2: $CH_2(OOH)CO(O^-) + HO^{\bullet} \rightarrow C^{\bullet}H(OOH)CO(O^-) + H_2O$                                                     |        | 1.2 10 <sup>8</sup>                |             |                            | BR: 20% - 48                                                                         |
| $C^{\bullet}H(OOH)CO(O^-) + O_2 \rightarrow CH(OOH)(OO^{\bullet})CO(O^-)$                                                                    |        | 2.0 10 <sup>9</sup>                |             |                            | 2                                                                                    |
| $CH_2(OOH)CO(O^-) + HO^{\bullet} \rightarrow 0.80 CH_2(OO^{\bullet})CO(O^-) + 0.20 CH(OOH)(OO^{\bullet})CO(O^-) + H_2O - 0.20 O_2$           | R(362) | 5.8 10 <sup>8</sup>                |             |                            | = k(CH <sub>3</sub> CH <sub>2</sub> (OOH) + HO <sup>•</sup> )                        |
| Pathway 1: $CH_2(OOH)CO(O^-) + NO_3^{\bullet} \rightarrow CH_2(OO^{\bullet})CO(O^-) + NO_3^- + H^+$                                          |        | 5.7 10 <sup>6</sup>                |             |                            | BR: 80%                                                                              |
| Pathway 2: $CH_2(OOH)CO(O^-) + NO_3^{\bullet} \rightarrow C^{\bullet}H(OOH)CO(O^-) + NO_3^- + H^+$                                           |        | 1.4 10 <sup>6</sup>                |             |                            | BR: 20%                                                                              |
| $C^{\bullet}H(OOH)CO(O^-) + O_2 \rightarrow CH(OOH)(OO^{\bullet})CO(O^-)$                                                                    |        | 2.0 10 <sup>9</sup>                |             |                            | 2                                                                                    |
| $CH_2(OOH)CO(O^-) + NO_3^{\bullet} \rightarrow 0.80 CH_2(OO^{\bullet})CO(O^-) + 0.20 CH(OOH)(OO^{\bullet})CO(O^-) + NO_3^- + H^+ - 0.20 O_2$ | R(363) | 7.1 10 <sup>6</sup>                |             | Herrmann and Zellner, 1998 | 3                                                                                    |
| $CH_2(OOH)CO(O^-) + Fe^{2+} \rightarrow CH_2(O^{\bullet})CO(O^-) + Fe^{3+} + OH^-$                                                           |        | 2.4 10 <sup>1</sup>                |             |                            |                                                                                      |
| $CH_2(O^{\bullet})CO(O^-) \rightarrow CH_2O + C^{\bullet}O(O^-)$                                                                             |        |                                    |             |                            | 21 - 22                                                                              |
| $C^{\bullet}O(O^-) + O_2 \rightarrow CO(O^-)(OO^{\bullet})$                                                                                  |        | 2.0 10 <sup>9</sup>                |             |                            | 2                                                                                    |
| $CO(O^-)(OO^{\bullet}) \rightarrow CO_2 + O_2^{\bullet-}$                                                                                    |        |                                    |             |                            | 5                                                                                    |
| $CH_2(OOH)CO(O^-) + Fe^{2+} \rightarrow CH_2O + CO_2 + Fe^{3+} + OH^- + O_2^{\bullet-} - O_2$                                                | R(364) | 2.4 10 <sup>1</sup>                |             |                            | = k(CH <sub>3</sub> CH <sub>2</sub> (OOH) + Fe <sup>2+</sup> )                       |
| $CH_2(OOH)CO(O^-) + hv \rightarrow CH_2(O^{\bullet})CO(O^-) + HO^{\bullet}$                                                                  |        | Calculated                         |             |                            |                                                                                      |
| $CH_2(O^{\bullet})CO(O^-) + H_2O \rightarrow C^{\bullet}H(OH)CO(O^-) + H_2O$                                                                 |        | 8.0 10 <sup>6</sup>                |             |                            | 10                                                                                   |
| $C^{\bullet}H(OH)CO(O^-) + O_2 \rightarrow CH(OH)(OO^{\bullet})CO(O^-)$                                                                      |        | 2.0 10 <sup>9</sup>                |             |                            | 2                                                                                    |
| $CH_2(OOH)CO(O^-) + hv \rightarrow CH(OH)(OO^{\bullet})CO(O^-) + HO^{\bullet} - O_2$                                                         | R(365) | Calculated                         |             |                            | = J(CH <sub>3</sub> CH <sub>2</sub> (OOH) + hv)                                      |
| $CH(OOH)(OO^{\bullet})CO(OH) + OH^- \rightarrow CH(OO^-)(OO^{\bullet})CO(OH) + H_2O$                                                         |        | 4.0 10 <sup>9</sup>                |             |                            |                                                                                      |
| $CH(OO^-)(OO^{\bullet})CO(OH) \rightarrow CO(OH)CO(OH) + O_2^{\bullet-}$                                                                     |        |                                    |             |                            | 11                                                                                   |
| $CH(OOH)(OO^{\bullet})CO(OH) + OH^- \rightarrow CO(OH)CO(OH) + O_2^{\bullet-} + H_2O$                                                        | R(366) | 4.0 10 <sup>9</sup>                |             |                            | = k(CH <sub>3</sub> CH(OH)(OO <sup>•</sup> ) + OH <sup>-</sup> ) - 12                |
| $CH(OOH)(OO^{\bullet})CO(OH) \rightarrow CO(OH)CO(OH) + HO_2^{\bullet}$                                                                      | R(367) | 1.9 10 <sup>2</sup>                |             |                            | = k(CH(OH)(OO <sup>•</sup> )CO(OH) → CHOCO(OH) + HO <sub>2</sub> <sup>•</sup> ) - 49 |

| Reactions                                                                                                                                                                 |        | $k_{298}$<br>( $M^{-n+1} s^{-1}$ ) | Ea/R<br>(K) | References                  | Notes                                                                   |
|---------------------------------------------------------------------------------------------------------------------------------------------------------------------------|--------|------------------------------------|-------------|-----------------------------|-------------------------------------------------------------------------|
| $CH(OOH)(OO^*)CO(O^-) + OH^- \rightarrow CH(OO^-)(OO^*)CO(O^-) + H_2O$                                                                                                    |        | $4.0 \cdot 10^9$                   |             |                             |                                                                         |
| $CH(OO^-)(OO^*)CO(O^-) \rightarrow CO(OH)CO(O^-) + O_2^{\bullet -}$                                                                                                       |        |                                    |             |                             | 11                                                                      |
| $CH(OOH)(OO^*)CO(O^-) + OH^- \rightarrow CO(OH)CO(O^-) + O_2^{\bullet -} + H_2O$                                                                                          | R(368) | $4.0 \cdot 10^9$                   |             |                             | = $k(CH_3CH(OH)(OO^*) + OH^-)$ - 12                                     |
| $CH(OOH)(OO^*)CO(O^-) \rightarrow CO(OH)CO(O^-) + HO_2^{\bullet}$                                                                                                         | R(369) | $1.9 \cdot 10^2$                   |             |                             | = $k(CH(OH)(OO^*)CO(O^-) \rightarrow CHOCO(O^-) + HO_2^{\bullet})$ - 50 |
| <b>Oxidation of Glycolic acid</b>                                                                                                                                         |        |                                    |             |                             |                                                                         |
| Pathway 1: $CH_2(OH)CO(OH) + HO^{\bullet} \rightarrow C^*H(OH)CO(OH) + H_2O$                                                                                              |        | $3.7 \cdot 10^8$                   |             |                             | BR: 62% - 15                                                            |
| $C^*H(OH)CO(OH) + O_2 \rightarrow CH(OH)(OO^*)CO(OH)$                                                                                                                     |        | $2.0 \cdot 10^9$                   |             |                             | 2                                                                       |
| Pathway 2: $CH_2(OH)CO(OH) + HO^{\bullet} \rightarrow CH_2(O^*)CO(OH) + H_2O$                                                                                             |        | $2.3 \cdot 10^8$                   |             |                             | BR: 38% - 15                                                            |
| $CH_2(O^*)CO(OH) \rightarrow CH_2O + C^*O(OH)$                                                                                                                            |        |                                    |             |                             | 21 - 22                                                                 |
| $C^*O(OH) + O_2 \rightarrow CO(OH)(OO^*)$                                                                                                                                 |        | $2.0 \cdot 10^9$                   |             |                             | 2                                                                       |
| $CH_2(OH)CO(OH) + HO^{\bullet} \rightarrow 0.62 CH(OH)(OO^*)CO(OH) + 0.38 CH_2O + 0.38 CO(OH)(OO^*) + H_2O - O_2$                                                         | R(370) | $6.0 \cdot 10^8$                   |             | Buxton et al., 1988         |                                                                         |
| Pathway 1: $CH_2(OH)CO(OH) + NO_3^{\bullet} \rightarrow C^*H(OH)CO(OH) + NO_3^- + H^+$                                                                                    |        | $5.6 \cdot 10^5$                   |             |                             | BR: 62%                                                                 |
| $C^*H(OH)CO(OH) + O_2 \rightarrow CH(OH)(OO^*)CO(OH)$                                                                                                                     |        | $2.0 \cdot 10^9$                   |             |                             | 2                                                                       |
| Pathway 2: $CH_2(OH)CO(OH) + NO_3^{\bullet} \rightarrow CH_2(O^*)CO(OH) + NO_3^- + H^+$                                                                                   |        | $3.5 \cdot 10^5$                   |             |                             | BR: 38%                                                                 |
| $CH_2(O^*)CO(OH) \rightarrow CH_2O + C^*O(OH)$                                                                                                                            |        |                                    |             |                             | 21 - 22                                                                 |
| $C^*O(OH) + O_2 \rightarrow CO(OH)(OO^*)$                                                                                                                                 |        | $2.0 \cdot 10^9$                   |             |                             | 2                                                                       |
| $CH_2(OH)CO(OH) + NO_3^{\bullet} \rightarrow 0.62 CH(OH)(OO^*)CO(OH) + 0.38 CH_2O + 0.38 CO(OH)(OO^*) + NO_3^- + H^+ - O_2$                                               | R(371) | $9.1 \cdot 10^5$                   | 3971        | De Semainville et al., 2007 | 3                                                                       |
| $CH(OH)(OO^*)CO(OH) + OH^- \rightarrow CH(O^-)(OO^*)CO(OH) + H_2O$                                                                                                        |        | $4.0 \cdot 10^9$                   |             |                             |                                                                         |
| $CH(O^-)(OO^*)CO(OH) \rightarrow CHOCO(OH) + O_2^{\bullet -}$                                                                                                             |        |                                    |             |                             | 5                                                                       |
| $CH(OH)(OO^*)CO(OH) + OH^- \rightarrow CHOCO(OH) + O_2^{\bullet -} + H_2O$                                                                                                | R(372) | $4.0 \cdot 10^9$                   |             |                             | = $k(CH_3CH(OH)(OO^*) + OH^-)$                                          |
| $CH(OH)(OO^*)CO(OH) \rightarrow CHOCO(OH) + HO_2^{\bullet}$                                                                                                               | R(373) | $1.9 \cdot 10^2$                   |             |                             | 4                                                                       |
| Pathway 1: $CH_2(OH)CO(O^-) + HO^{\bullet} \rightarrow C^*H(OH)CO(O^-) + H_2O$                                                                                            |        | $5.2 \cdot 10^8$                   |             |                             | BR: 60% - 15                                                            |
| $C^*H(OH)CO(O^-) + O_2 \rightarrow CH(OH)(OO^*)CO(O^-)$                                                                                                                   |        | $2.0 \cdot 10^9$                   |             |                             | 2                                                                       |
| Pathway 2: $CH_2(OH)CO(O^-) + HO^{\bullet} \rightarrow CH_2(O^*)CO(O^-) + H_2O$                                                                                           |        | $1.6 \cdot 10^8$                   |             |                             | BR: 19% - 15                                                            |
| $CH_2(O^*)CO(O^-) \rightarrow CH_2O + C^*O(O^-)$                                                                                                                          |        |                                    |             |                             | 21 - 22                                                                 |
| $C^*O(O^-) + O_2 \rightarrow CO(O^-)(OO^*)$                                                                                                                               |        | $2.0 \cdot 10^9$                   |             |                             | 2                                                                       |
| $CO(O^-)(OO^*) \rightarrow CO_2 + O_2^{\bullet -}$                                                                                                                        |        |                                    |             |                             | 5                                                                       |
| Pathway 3: $CH_2(OH)CO(O^-) + HO^{\bullet} \rightarrow CH_2(OH)CO(O^*) + OH^-$                                                                                            |        | $1.8 \cdot 10^8$                   |             |                             | BR: 21% - 15                                                            |
| $CH_2(OH)CO(O^*) \rightarrow C^*H_2(OH) + CO_2$                                                                                                                           |        |                                    |             |                             | 21 - 22                                                                 |
| $C^*H_2(OH) + O_2 \rightarrow CH_2(OH)(OO^*)$                                                                                                                             |        | $2.0 \cdot 10^9$                   |             |                             | 2                                                                       |
| $CH_2(OH)CO(O^-) + HO^{\bullet} \rightarrow 0.60 CH(OH)(OO^*)CO(O^-) + 0.21 CH_2(OH)(OO^*) + 0.19 CH_2O + 0.40 CO_2 + 0.19 O_2^{\bullet -} + 0.21 OH^- + 0.79 H_2O - O_2$ | R(374) | $8.6 \cdot 10^8$                   |             | Buxton et al., 1988         |                                                                         |
| Pathway 1: $CH_2(OH)CO(O^-) + NO_3^{\bullet} \rightarrow C^*H(OH)CO(O^-) + NO_3^- + H^+$                                                                                  |        | $7.6 \cdot 10^6$                   |             |                             | BR: 76%                                                                 |
| $C^*H(OH)CO(O^-) + O_2 \rightarrow CH(OH)(OO^*)CO(O^-)$                                                                                                                   |        | $2.0 \cdot 10^9$                   |             |                             | 2                                                                       |
| Pathway 2: $CH_2(OH)CO(O^-) + NO_3^{\bullet} \rightarrow CH_2(O^*)CO(O^-) + NO_3^- + H^+$                                                                                 |        | $2.4 \cdot 10^6$                   |             |                             | BR: 24%                                                                 |
| $CH_2(O^*)CO(O^-) \rightarrow CH_2O + C^*O(O^-)$                                                                                                                          |        |                                    |             |                             | 21 - 22                                                                 |
| $C^*O(O^-) + O_2 \rightarrow CO(O^-)(OO^*)$                                                                                                                               |        | $2.0 \cdot 10^9$                   |             |                             | 2                                                                       |
| $CO(O^-)(OO^*) \rightarrow CO_2 + O_2^{\bullet -}$                                                                                                                        |        |                                    |             |                             | 5                                                                       |
| $CH_2(OH)CO(O^-) + NO_3^{\bullet} \rightarrow 0.76 CH(OH)(OO^*)CO(O^-) + 0.24 CH_2O + 0.24 CO_2 + 0.24 O_2^{\bullet -} + NO_3^- + H^+ - O_2$                              | R(375) | $1.0 \cdot 10^7$                   | 3008        | De Semainville et al., 2007 | 3                                                                       |
| $CH(OH)(OO^*)CO(O^-) + OH^- \rightarrow CH(O^-)(OO^*)CO(O^-) + H_2O$                                                                                                      |        | $4.0 \cdot 10^9$                   |             |                             |                                                                         |
| $CH(O^-)(OO^*)CO(O^-) \rightarrow CHOCO(O^-) + O_2^{\bullet -}$                                                                                                           |        |                                    |             |                             | 5                                                                       |
| $CH(OH)(OO^*)CO(O^-) + OH^- \rightarrow CHOCO(O^-) + O_2^{\bullet -} + H_2O$                                                                                              | R(376) | $4.0 \cdot 10^9$                   |             |                             | = $k(CH_3CH(OH)(OO^*) + OH^-)$                                          |

| Reactions                                                                                                                                                                                                                                |        | $k_{298}$<br>( $M^{-n+1} s^{-1}$ )   | Ea/R<br>(K) | References                                              | Notes                                    |
|------------------------------------------------------------------------------------------------------------------------------------------------------------------------------------------------------------------------------------------|--------|--------------------------------------|-------------|---------------------------------------------------------|------------------------------------------|
| $CH(OH)(OO^*)CO(O^-) \rightarrow CHOCO(O^-) + HO_2^*$                                                                                                                                                                                    | R(377) | $1.9 \cdot 10^2$                     |             |                                                         | 4                                        |
| <b>Oxidation of Glyoxylic acid</b>                                                                                                                                                                                                       |        |                                      |             |                                                         |                                          |
| Pathway 1: $CH(OH)(OH)CO(OH) + HO^* \rightarrow C^*(OH)(OH)CO(OH) + H_2O$<br>$C^*(OH)(OH)CO(OH) + O_2 \rightarrow CO(OH)C(OH)(OH)(OO^*)$                                                                                                 |        | $5.0 \cdot 10^7$<br>$2.0 \cdot 10^9$ |             |                                                         | BR: 15% - 15<br>2                        |
| Pathway 2: $CH(OH)(OH)CO(OH) + HO^* \rightarrow CH(O^*)(OH)CO(OH) + H_2O$<br>$CH(O^*)(OH)CO(OH) \rightarrow CHO(OH) + C^*O(OH)$<br>$C^*O(OH) + O_2 \rightarrow CO(OH)(OO^*)$                                                             |        | $2.8 \cdot 10^8$<br>$2.0 \cdot 10^9$ |             |                                                         | BR: 85% - 15<br>21 - 22<br>2             |
| $CH(OH)(OH)CO(OH) + HO^* \rightarrow 0.15 CO(OH)C(OH)(OH)(OO^*) + 0.85 CHO(OH) + 0.85 CO(OH)(OO^*) + H_2O - O_2$                                                                                                                         | R(378) | $3.3 \cdot 10^8$                     | 1000        | Ervens et al., 2003 -<br>corrected by<br>Schaefer, 2012 | 52                                       |
| Pathway 1: $CH(OH)(OH)CO(OH) + NO_3^* \rightarrow C^*(OH)(OH)CO(OH) + H^* + NO_3^-$<br>$C^*(OH)(OH)CO(OH) + O_2 \rightarrow CO(OH)C(OH)(OH)(OO^*)$                                                                                       |        | $2.0 \cdot 10^5$<br>$2.0 \cdot 10^9$ |             |                                                         | BR: 15%<br>2                             |
| Pathway 2: $CH(OH)(OH)CO(OH) + NO_3^* \rightarrow CH(O^*)(OH)CO(OH) + H^* + NO_3^-$<br>$CH(O^*)(OH)CO(OH) \rightarrow CHO(OH) + C^*O(OH)$<br>$C^*O(OH) + O_2 \rightarrow CO(OH)(OO^*)$                                                   |        | $9.0 \cdot 10^5$<br>$2.0 \cdot 10^9$ |             |                                                         | BR: 85%<br>21 - 22<br>2                  |
| $CH(OH)(OH)CO(OH) + NO_3^* \rightarrow 0.15 CO(OH)C(OH)(OH)(OO^*) + 0.85 CHO(OH) + 0.85 CO(OH)(OO^*) + H^* + NO_3^- - O_2$                                                                                                               | R(379) | $1.0 \cdot 10^6$                     |             |                                                         | = $k(CH(OH)(OH)CH(OH)(OH) + NO_3^*) - 3$ |
| Pathway 1: $CH(OH)(OH)CO(O^-) + HO^* \rightarrow C^*(OH)(OH)CO(O^-) + H_2O$<br>$C^*(OH)(OH)CO(O^-) + O_2 \rightarrow CO(O^-)C(OH)(OH)(OO^*)$                                                                                             |        | $6.0 \cdot 10^8$<br>$2.0 \cdot 10^9$ |             |                                                         | BR: 26% - 53<br>2                        |
| Pathway 2: $CH(OH)(OH)CO(O^-) + HO^* \rightarrow CH(O^*)(OH)CO(O^-) + H_2O$<br>$CH(O^*)(OH)CO(O^-) \rightarrow CHO(OH) + C^*O(O^-)$<br>$C^*O(O^-) + O_2 \rightarrow CO(O^-)(OO^*)$<br>$CO(O^-)(OO^*) \rightarrow CO_2 + O_2^*$           |        | $1.9 \cdot 10^9$<br>$2.0 \cdot 10^9$ |             |                                                         | BR: 74% - 53<br>21 - 22<br>2<br>5        |
| $CH(OH)(OH)CO(O^-) + HO^* \rightarrow 0.26 CO(O^-)C(OH)(OH)(OO^*) + 0.74 CHO(OH) + 0.74 CO_2 + 0.74 O_2^* + H_2O - O_2$                                                                                                                  | R(380) | $2.5 \cdot 10^9$                     | 4300        | Ervens et al., 2003<br>corrected by<br>Schaefer, 2012   | 52                                       |
| Pathway 1: $CH(OH)(OH)CO(O^-) + NO_3^* \rightarrow C^*(OH)(OH)CO(O^-) + H^* + NO_3^-$<br>$C^*(OH)(OH)CO(O^-) + O_2 \rightarrow CO(O^-)C(OH)(OH)(OO^*)$                                                                                   |        | $5.0 \cdot 10^4$<br>$2.0 \cdot 10^9$ |             |                                                         | BR: 26%<br>2                             |
| Pathway 2: $CH(OH)(OH)CO(O^-) + NO_3^* \rightarrow CH(O^*)(OH)CO(O^-) + H^* + NO_3^-$<br>$CH(O^*)(OH)CO(O^-) \rightarrow CHO(OH) + C^*O(O^-)$<br>$C^*O(O^-) + O_2 \rightarrow CO(O^-)(OO^*)$<br>$CO(O^-)(OO^*) \rightarrow CO_2 + O_2^*$ |        | $1.3 \cdot 10^5$<br>$2.0 \cdot 10^9$ |             |                                                         | BR: 74%<br>21 - 22<br>2<br>5             |
| $CH(OH)(OH)CO(O^-) + NO_3^* \rightarrow 0.26 CO(O^-)C(OH)(OH)(OO^*) + 0.74 CHO(OH) + 0.74 CO_2 + 0.74 O_2^* + NO_3^- + H^* - O_2$                                                                                                        | R(381) | $1.8 \cdot 10^5$                     |             | Herrmann and<br>Zellner, 1998                           | 3                                        |
| $CH(OH)(OH)CO(O^-) + H_2O_2 \rightarrow CHO(O^-) + CO_2 + 2 H_2O$                                                                                                                                                                        | R(382) | $1.1 \cdot 10^{-1}$                  |             | Schöne and<br>Herrmann, 2014                            |                                          |
| $CO(OH)C(OH)(OH)(OO^*) + OH^- \rightarrow CO(OH)C(OH)(O^-)(OO^*) + H_2O$<br>$CO(OH)C(OH)(O^-)(OO^*) \rightarrow CO(OH)CO(OH) + O_2^*$                                                                                                    |        | $4.0 \cdot 10^9$                     |             |                                                         | 5                                        |
| $CO(OH)C(OH)(OH)(OO^*) + OH^- \rightarrow CO(OH)CO(OH) + O_2^* + H_2O$                                                                                                                                                                   | R(383) | $4.0 \cdot 10^9$                     |             |                                                         | = $k(CH_3CH(OH)(OO^*) + OH^-)$           |
| $CO(OH)C(OH)(OH)(OO^*) \rightarrow CO(OH)CO(OH) + HO_2^*$                                                                                                                                                                                | R(384) | $1.0 \cdot 10^6$                     |             |                                                         | 17                                       |
| $CO(O^-)C(OH)(OH)(OO^*) + OH^- \rightarrow CO(O^-)C(OH)(O^-)(OO^*) + H_2O$<br>$CO(O^-)C(OH)(O^-)(OO^*) \rightarrow CO(O^-)CO(OH) + O_2^*$                                                                                                |        | $4.0 \cdot 10^9$                     |             |                                                         | 5                                        |
| $CO(O^-)C(OH)(OH)(OO^*) + OH^- \rightarrow CO(O^-)CO(OH) + O_2^* + H_2O$                                                                                                                                                                 | R(385) | $4.0 \cdot 10^9$                     |             |                                                         | = $k(CH_3CH(OH)(OO^*) + OH^-)$           |
| $CO(O^-)C(OH)(OH)(OO^*) \rightarrow CO(O^-)CO(OH) + HO_2^*$                                                                                                                                                                              | R(386) | $1.0 \cdot 10^6$                     |             |                                                         | 17                                       |

| Reactions                                                                                                                                                                                                                                                                                                                                         | $k_{298}$<br>( $M^{-n+1} s^{-1}$ ) | Ea/R<br>(K) | References | Notes                                                     |
|---------------------------------------------------------------------------------------------------------------------------------------------------------------------------------------------------------------------------------------------------------------------------------------------------------------------------------------------------|------------------------------------|-------------|------------|-----------------------------------------------------------|
| <b>R(OO•) produced by C3 oxidation</b>                                                                                                                                                                                                                                                                                                            |                                    |             |            | 54                                                        |
| Pathway 1: $2 \text{CHOCH}_2(\text{OO}^\bullet) \rightarrow 2 \text{CHOCHO} + \text{H}_2\text{O}_2$                                                                                                                                                                                                                                               | $1.8 \cdot 10^8$                   |             |            | BR: 45%                                                   |
| Pathway 2: $2 \text{CHOCH}_2(\text{OO}^\bullet) \rightarrow \text{CHOCHO} + \text{CH}_2(\text{OH})\text{CHO} + \text{O}_2$                                                                                                                                                                                                                        | $8.0 \cdot 10^7$                   |             |            | BR: 20%                                                   |
| Pathway 3: $2 \text{CHOCH}_2(\text{OO}^\bullet) \rightarrow 2 \text{CHOCH}_2(\text{O}^\bullet) + \text{O}_2$                                                                                                                                                                                                                                      | $1.4 \cdot 10^8$                   |             |            | BR: 35%                                                   |
| $\text{CHOCH}_2(\text{O}^\bullet) \rightarrow \text{C}^\bullet\text{HO} + \text{CH}_2\text{O}$                                                                                                                                                                                                                                                    |                                    |             |            | 21 - 22                                                   |
| $\text{C}^\bullet\text{HO} + \text{O}_2 \rightarrow \text{CHO}(\text{OO}^\bullet)$                                                                                                                                                                                                                                                                | $2.0 \cdot 10^9$                   |             |            | 2                                                         |
| $2 \text{CHOCH}_2(\text{OO}^\bullet) \rightarrow 1.10 \text{CHOCHO} + 0.20 \text{CH}_2(\text{OH})\text{CHO} + 0.70 \text{CH}_2\text{O} + 0.70 \text{CHO}(\text{OO}^\bullet) + 0.45 \text{H}_2\text{O}_2 - 0.15 \text{O}_2$                                                                                                                        | $4.0 \cdot 10^8$                   |             | R(387)     | = $k(2 \text{CH}_3\text{COCH}_2(\text{OO}^\bullet)) - 29$ |
| Pathway 1: $2 \text{CH}(\text{OH})(\text{OH})\text{CH}_2(\text{OO}^\bullet) + 2 \text{H}_2\text{O} \rightarrow 2 \text{CH}(\text{OH})(\text{OH})\text{CH}(\text{OH})(\text{OH}) + \text{H}_2\text{O}_2$                                                                                                                                           | $1.8 \cdot 10^8$                   |             |            | BR: 45%                                                   |
| Pathway 2: $2 \text{CH}(\text{OH})(\text{OH})\text{CH}_2(\text{OO}^\bullet) + \text{H}_2\text{O} \rightarrow \text{CH}(\text{OH})(\text{OH})\text{CH}(\text{OH})(\text{OH}) + \text{CH}_2(\text{OH})\text{CH}(\text{OH})(\text{OH}) + \text{O}_2$                                                                                                 | $8.0 \cdot 10^7$                   |             |            | BR: 20%                                                   |
| Pathway 3: $2 \text{CH}(\text{OH})(\text{OH})\text{CH}_2(\text{OO}^\bullet) \rightarrow 2 \text{CH}(\text{OH})(\text{OH})\text{CH}_2(\text{O}^\bullet) + \text{O}_2$                                                                                                                                                                              | $1.4 \cdot 10^8$                   |             |            | BR: 35%                                                   |
| $\text{CH}(\text{OH})(\text{OH})\text{CH}_2(\text{O}^\bullet) \rightarrow \text{C}^\bullet\text{H}(\text{OH})(\text{OH}) + \text{CH}_2\text{O}$                                                                                                                                                                                                   |                                    |             |            | 21 - 22                                                   |
| $\text{C}^\bullet\text{H}(\text{OH})(\text{OH}) + \text{O}_2 \rightarrow \text{CH}(\text{OH})(\text{OH})(\text{OO}^\bullet)$                                                                                                                                                                                                                      | $2.0 \cdot 10^9$                   |             |            | 2                                                         |
| $2 \text{CH}(\text{OH})(\text{OH})\text{CH}_2(\text{OO}^\bullet) \rightarrow 1.10 \text{CH}(\text{OH})(\text{OH})\text{CH}(\text{OH})(\text{OH}) + 0.20 \text{CH}_2(\text{OH})\text{CH}(\text{OH})(\text{OH}) + 0.70 \text{CH}_2\text{O} + 0.70 \text{CH}(\text{OH})(\text{OH})(\text{OO}^\bullet) + 0.45 \text{H}_2\text{O}_2 - 0.15 \text{O}_2$ | $4.0 \cdot 10^8$                   |             | R(388)     | = $k(2 \text{CH}_3\text{COCH}_2(\text{OO}^\bullet)) - 29$ |

1 - The reactivity of HMHP with HO• is supposed similar to the reactivity of MHP with HO•.  $k(\text{CH}_2(\text{OOH})(\text{OH}) + \text{HO}^\bullet) = k(\text{CH}_3(\text{OOH}) + \text{HO}^\bullet)$  and the branching ratio are identical to those measured by Monod et al. (2007) for MHP.

2 - We assumed a fast rate constant equal to  $2.0 \cdot 10^9 \text{ M}^{-1} \text{ s}^{-1}$  based on values compiled in Neta et al. (1990). This reaction is not a rate-determining step.

3 - The oxidation by the radicals ( $\text{NO}_3^\bullet$ ,  $\text{SO}_4^\bullet$ ,  $\text{Cl}^\bullet$ ,  $\text{Cl}_2^\bullet$ ,  $\text{CO}_3^\bullet$ ) is supposed to produce the same R(OO•) as the oxidation by HO• with the same branching ratios. The electron transfer pathways are not considered for these radicals.

4 - The  $\text{HO}_2^\bullet$  elimination rate constant depends on the substituent attached to the carbon atom bearing the peroxy function.

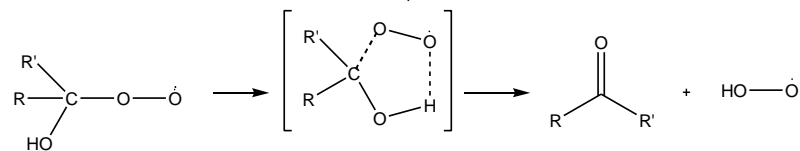

Von Sonntag (1987) compiled the following rate constants for :

| R               | R'                   | k ( $s^{-1}$ ) |
|-----------------|----------------------|----------------|
| H               | H                    | <10            |
| H               | CH <sub>3</sub>      | 52             |
| H               | CH <sub>2</sub> (OH) | 190            |
| CH <sub>3</sub> | CH <sub>3</sub>      | 665            |

For secondary carbon atom bearing the peroxy function, we assumed a rate of  $665 \text{ s}^{-1}$ .

For primary carbon atom, we assumed a value of  $52 \text{ s}^{-1}$ . If the neighboring carbon atom is bearing an oxygenated function, we assumed a value of  $190 \text{ s}^{-1}$ .

5 - Non-limiting reaction following Bothe et al. (1978).

6 - We suppose that the  $\text{HO}_2^\bullet$  elimination for  $\text{CH}(\text{OH})(\text{OOH})(\text{OO}^\bullet)$  is similar to the one for  $\text{RC}(\text{OH})(\text{OH})(\text{OO}^\bullet)$  with the same rate constant equal to  $1.0 \cdot 10^6 \text{ s}^{-1}$ .

7 - We followed the work from De Filippis et al. (2009); rate constants have been recalculated at  $25^\circ\text{C}$ ; we supposed a slow production of  $\text{CO}_2$ .

The equilibrium is explicitly considered because the formation of performic acid is slow.

- 8 - Following Monod et al., (2007), the branching ratio is assumed to be 80/20.
- 9 - The branching ratio is estimated to be 20% by Schuchmann and von Sonntag (1984) for the CH<sub>2</sub>O formation. Monod et al. (2007) estimated that the alkoxy radical formation pathway (CH<sub>3</sub>O<sup>\*</sup>) is the main pathway. We therefore assumed a branching ratio of 80% for this pathway.
- 10 - DeCosta and Pincock (1989) showed that electron transfer proceeds with a rate constant around 1.0 10<sup>10</sup> s<sup>-1</sup>. We assumed that the electron transfer is non limiting.
- 11 - We suppose that this step is a non-limiting reaction.
- 12 - We suppose that the H-abstraction on the (OOH)(OO<sup>\*</sup>) group by OH<sup>\*</sup> proceeds as fast as the H-abstraction for the (OH)(OO<sup>\*</sup>) group (k = 4.0 10<sup>9</sup> M<sup>-1</sup> s<sup>-1</sup>).
- 13 - We suppose that the HO<sub>2</sub><sup>\*</sup> elimination from CH<sub>2</sub>(OOH)(OO<sup>\*</sup>) is as fast as the one of CH<sub>2</sub>(OH)(OO<sup>\*</sup>).
- 14 - We consider only the reactivity of the hydrated form that represent 99% of the total formaldehyde.
- 15 - Branching ratios are calculated by the SAR from Doussin and Monod (2013).
- 16 - The rate constant comes from the literature; the branching ratio are estimated by the SAR from Doussin and Monod (2013).
- 17 - Von Sonntag (1987) et Schuchmann and Von Sonntag (1988) have shown that the HO<sub>2</sub><sup>\*</sup> elimination for RC(OH)(OH)(OO<sup>\*</sup>) species is fast. This is confirmed by Mc Elroy and Waygood (1991) for hydrated formaldehyde. We supposed a kinetic constant equal to 1.0 10<sup>6</sup> s<sup>-1</sup>.
- 18 - We suppose that the HO<sub>2</sub><sup>\*</sup> elimination for CO(OH)(OO<sup>\*</sup>) is similar to the one for RC(OH)(OH)(OO<sup>\*</sup>) with the same rate constant equal to 1.0 10<sup>6</sup> s<sup>-1</sup>.
- 19 - This reaction is non-limiting following Bothe et al. (1978). We consider a rate constant of 1.0 10<sup>6</sup> s<sup>-1</sup>.
- 20 - Branching ratios are calculated by the SAR from Doussin and Monod (2013) : 87% for CH<sub>2</sub>, 9% for CH<sub>3</sub> and 4% for (OH). The 2 first pathways are considered corresponding to 96% of the total reactivity. They have been scaled to 90/10%.
- 21 - Hilborn and Pincock (1991) showed that acyl alkoxy radical RCO(O<sup>\*</sup>) are fragmented with a rate constant around 1.0 10<sup>9</sup> s<sup>-1</sup>. We assumed that the alkoxy fragmentation is non limiting.
- 22 - For alkoxy radical, we assume an electron transfer reaction. When an oxygenated functional group is in β-position, we assume a fragmentation of the corresponding c-c bond. When there are two oxygenated function in β-position, we assume that the fragmentation occurs in priority on the C-CO(OH) bond.
- 23 - 3 pathways are considered corresponding to 90% of the total reactivity. Branching ratio in Piesiak et al. (1984) are 45/30/15%. They have been scaled to 50/33/17%.
- 24 - K<sub>h</sub> = 1.2; we consider the reactivity of the hydrated and non-hydrated forms.
- 25 - Branching ratios are calculated by the SAR from Doussin and Monod (2013). The major pathway is the H-abstraction from CHO (97%) and is the only considered way. It has been scaled to 100%.
- 26 - Rouse and George (2004) measured global rate constant for acetaldehyde. We decompose it into the sum of k(CH<sub>3</sub>CHO + NO<sub>3</sub><sup>\*</sup>) and k(CH<sub>3</sub>CH(OH)(OH) + NO<sub>3</sub><sup>\*</sup>) weighted by the proportion of the hydrated and the non-hydrated form :  $k_{\text{global}} = k(\text{CH}_3\text{CHO} + \text{NO}_3^*) \times \frac{1}{1+K_h} + k(\text{CH}_3\text{CH(OH)(OH)} + \text{NO}_3^*) \times \frac{K_h}{1+K_h}$  To determine k(CH<sub>3</sub>CHO + NO<sub>3</sub><sup>\*</sup>) and k(CH<sub>3</sub>CH(OH)(OH) + NO<sub>3</sub><sup>\*</sup>), we assumed that their ratio is equal to the ratio  $\frac{k(\text{CH}_3\text{CHO} + \text{HO}^*)}{k(\text{CH}_3\text{CH(OH)(OH)} + \text{HO}^*)}$ .  $k_{\text{global}} = 2.0 \cdot 10^6 \text{ M}^{-1} \text{ s}^{-1}$  and  $k(\text{CH}_3\text{CHO} + \text{NO}_3^*) = 3.1 \cdot 10^6 \text{ M}^{-1} \text{ s}^{-1}$  and  $k(\text{CH}_3\text{CH(OH)(OH)} + \text{NO}_3^*) = 1.1 \cdot 10^6 \text{ M}^{-1} \text{ s}^{-1}$ .
- 27 - Jacobi et al. (1996) measured global rate constant for acetaldehyde. We decompose it into the sum of k(CH<sub>3</sub>CHO + Cl<sub>2</sub><sup>\*</sup>) and k(CH<sub>3</sub>CH(OH)(OH) + Cl<sub>2</sub><sup>\*</sup>) weighted by the proportion of the hydrated and the non-hydrated form :  $k_{\text{global}} = k(\text{CH}_3\text{CHO} + \text{Cl}_2^*) \times \frac{1}{1+K_h} + k(\text{CH}_3\text{CH(OH)(OH)} + \text{Cl}_2^*) \times \frac{K_h}{1+K_h}$  To determine k(CH<sub>3</sub>CHO + Cl<sub>2</sub><sup>\*</sup>) and k(CH<sub>3</sub>CH(OH)(OH) + Cl<sub>2</sub><sup>\*</sup>), we assumed that their ratio is equal to the ratio  $\frac{k(\text{CH}_3\text{CHO} + \text{HO}^*)}{k(\text{CH}_3\text{CH(OH)(OH)} + \text{HO}^*)}$ .  $k_{\text{global}} = 4.0 \cdot 10^4 \text{ M}^{-1} \text{ s}^{-1}$  and  $k(\text{CH}_3\text{CHO} + \text{Cl}_2^*) = 6.3 \cdot 10^4 \text{ M}^{-1} \text{ s}^{-1}$  and  $k(\text{CH}_3\text{CH(OH)(OH)} + \text{Cl}_2^*) = 2.1 \cdot 10^4 \text{ M}^{-1} \text{ s}^{-1}$ .
- 28 - Branching ratios are calculated by the SAR from Doussin and Monod (2013) : 63% for CH, 31% for OH and 6% for CH<sub>3</sub>. The 2 first pathways are considered corresponding to 94% of the total reactivity. They have been scaled to 67/33%.
- 29 - For self-reaction of peroxy radicals, we follow these similarity criteria:

| Peroxy categories                                                  | Model compounds                                        | References               |
|--------------------------------------------------------------------|--------------------------------------------------------|--------------------------|
| >C(OO <sup>*</sup> )CO(OH)/>C(OO <sup>*</sup> )CO(O <sup>*</sup> ) | CH <sub>2</sub> (OO <sup>*</sup> )CO(O <sup>*</sup> )  | Schuchmann et al. (1985) |
| >C(OH)C(OO <sup>*</sup> )<                                         | CH <sub>2</sub> (OH)CH <sub>2</sub> (OO <sup>*</sup> ) | Piesiak et al. (1984)    |
| >COC(OO <sup>*</sup> )<                                            | CH <sub>3</sub> COCH <sub>2</sub> (OO <sup>*</sup> )   | Zegota et al. (1986b)    |
| Others                                                             | CH <sub>3</sub> CH <sub>2</sub> (OO <sup>*</sup> )     | Monod et al. (2007)      |

- 30 - Reaction of CH<sub>3</sub>CO(OO<sup>\*</sup>) with HO<sub>2</sub><sup>\*</sup> is not considered because we assumed that this reaction is much slower than the reaction with O<sub>2</sub><sup>\*</sup> that proceeds by electron transfer.
- 31 - K<sub>h</sub> = 10; we consider the reactivity of the hydrated and non-hydrated forms.
- 32 - Branching ratios are calculated by the SAR from Doussin and Monod (2013) : 70% for CHO, 25% for CH<sub>2</sub> and 5% for OH. The 2 first pathways are considered corresponding to 95% of the total reactivity. They have been scaled to 77/23%.

- 33 - Rate constant calculated from Doussin and Monod (2013).
- 34 - Branching ratios are calculated by the SAR from Doussin and Monod (2013) : 30% for CH on CH(OH)(OH), 26% for CH<sub>2</sub>, 36% for (OH) on CH(OH)(OH), and 8% for (OH) on CH<sub>2</sub>(OH). The 3 first pathways are considered corresponding to 92% of the total reactivity. They have been scaled to 33/28/39%.
- 35 - The hydration constants for the di-hydrated and mono-hydrated forms are respectively equal to 173 and 0.85 ; we only consider the reactivity of the di-hydrated form.
- 36 - Branching ratios are calculated by the SAR from Doussin and Monod (2013) : 73% for (OH), 27% for CH. The 2 pathways are considered corresponding to 100% of the total reactivity.
- 37 - We suppose a rate constant of  $1.0 \cdot 10^6 \text{ M}^{-1} \text{ s}^{-1}$  typical of values measured in Neta and Huie (1986).
- 38 - We consider the slow equilibrium leading to the formation of peracetic acid (CH<sub>3</sub>CO(OOH)) through the oxidation of acetic acid by H<sub>2</sub>O<sub>2</sub> in the same way than for performic acid (CHO(OOH)).
- 39 - We consider the slow equilibrium leading to the formation of hydroxyperacetic acid (CH<sub>3</sub>CO(OOH)) through the oxidation of glycolic acid by H<sub>2</sub>O<sub>2</sub> in the same way than for performic acid (CHO(OOH)).
- 40 - Following Chevallier et al. (2004), we suppose the electron transfer rate constant for CH<sub>3</sub>CH<sub>2</sub>(O<sup>•</sup>) to be equal to the one for CH<sub>3</sub>O<sup>•</sup> estimated in Schuchmann and von Sonntag (1984).
- 41 - We suppose that the HO<sub>2</sub><sup>•</sup> elimination from CH<sub>3</sub>CH(OOH)(OO<sup>•</sup>) is as fast as the one of CH<sub>3</sub>CH(OH)(OO<sup>•</sup>).
- 42 - Schuchmann and von Sonntag (1984) estimated that branching ratio for pathway 1 is 20%. Following Monod et al. (2007), the "alkoxy" pathway (pathway 2) is more likely to occur. We considered a 80% branching ratio for pathway 2.
- 43 - Tetroxides form by the self reaction of the peroxy radical are not stable and further decompose following different pathways. These pathways are supposed to be similar to the self reaction of CH<sub>2</sub>(OO<sup>•</sup>)CO(O<sup>-</sup>) described by Schuchmann et al. (1985) with the same branching ratio.
- 44 - Schuchmann et al. (1985) measured a global rate constant for the CH<sub>2</sub>(OO<sup>•</sup>)CO(O<sup>-</sup>) of  $2k = 1.5 \cdot 10^8 \text{ M}^{-1} \text{ s}^{-1}$ . The reaction with O<sub>2</sub><sup>•-</sup> accounts for 13% of the total degradation and is neglected. The self-reaction therefore represents 87% of the total degradation. Branching ratio for pathways 1 to 4 measured by Schuchmann et al. (1985) (27/25/25/10) are scaled to 100% (30/30/30/10) with the global reaction rate  $7.5 \cdot 10^7 \text{ M}^{-1} \text{ s}^{-1}$ .
- 45 - The reactivity of the diacid form is neglected due to the very low pKa (~ 1.2).
- 46 - The equilibrium constants are from Martell and Smith (1977).  $\log K(\text{CO}(\text{O}^-)\text{CO}(\text{O}^-) + \text{Fe}^{3+} \leftrightarrow [\text{Fe}(\text{C}_2\text{O}_4)]^+) = 9.4$  ;  $\log K(2 \text{ CO}(\text{O}^-)\text{CO}(\text{O}^-) + \text{Fe}^{3+} \leftrightarrow [\text{Fe}(\text{C}_2\text{O}_4)_2]^-) = 16.2$  ;  $\log K(3 \text{ CO}(\text{O}^-)\text{CO}(\text{O}^-) + \text{Fe}^{3+} \leftrightarrow [\text{Fe}(\text{C}_2\text{O}_4)_3]^{3-}) = 20.4$ . We calculate the equilibrium constants :  $\log K(\text{CO}(\text{O}^-)\text{CO}(\text{O}^-) + [\text{Fe}(\text{C}_2\text{O}_4)]^+ \leftrightarrow [\text{Fe}(\text{C}_2\text{O}_4)_2]^-) = 6.8$  ;  $\log K(\text{CO}(\text{O}^-)\text{CO}(\text{O}^-) + [\text{Fe}(\text{C}_2\text{O}_4)_2]^- \leftrightarrow [\text{Fe}(\text{C}_2\text{O}_4)_3]^{3-}) = 4.2$ . With these equilibrium constants and the backward rate constant, we calculate the forward rate constants.
- 47 - Moorhead and Sutin (1966) measured rate constants for the equilibrium  $\text{Fe}(\text{OH})^{2+} + \text{CO}(\text{OH})\text{CO}(\text{O}^-) \leftrightarrow \text{Fe}(\text{C}_2\text{O}_4)^+ : k_{\text{backward}} = 3.0 \cdot 10^{-3} \text{ s}^{-1}$  and  $k_{\text{forward}} = 2.0 \cdot 10^4 \text{ M}^{-1} \text{ s}^{-1}$ . The equilibrium constant is similar to Martell and Smith (1977). We suppose that the rate constant of the reaction  $[\text{Fe}(\text{C}_2\text{O}_4)]^+ \rightarrow \text{CO}(\text{O}^-)\text{CO}(\text{O}^-) + \text{Fe}^{3+}$  is equal to  $3.0 \cdot 10^{-3} \text{ s}^{-1}$ .
- 48 - The reactivity of CH<sub>2</sub>(OOH)CO(OH)/CH<sub>2</sub>(OOH)CO(O<sup>-</sup>) with HO<sup>•</sup> is supposed similar to the reactivity of EHP (Ethyl hydroperoxide) with HO<sup>•</sup>. Therefore, we applied the same branching ratio 80/20%.
- 49 - We suppose that the HO<sub>2</sub><sup>•</sup> elimination from CO(OH)CH(OOH)(OO<sup>•</sup>) is as fast as the one of CH(OH)(OO<sup>•</sup>)CO(OH).
- 50 - We suppose that the HO<sub>2</sub><sup>•</sup> elimination from CO(O<sup>-</sup>)CH(OOH)(OO<sup>•</sup>) is as fast as the one of CH(OH)(OO<sup>•</sup>)CO(O<sup>-</sup>).
- 51 - The hydration constants are  $1.1 \cdot 10^3$  for glyoxylic acid and  $1.65 \cdot 10^1$  for glyoxylate. We therefore consider only the reactivity of the hydrated forms.
- 52 - The values from Ervens et al. (2003) was corrected following Shaeffer (2012).
- 53 - Branching ratios are calculated by the SAR from Doussin and Monod (2013) : 69% for (OH), 24% for CH on CH(OH)(OH) and 7% for the electron-transfer. The 2 first pathways are considered corresponding to 93% of the total reactivity. They have been recalculated to 74/26%.
- 54 - This radical is produced in the oxidation of 3-oxopropionic acid (C3).

## References:

- Bothe, E., Schuchmann, M. N., Schulte-Frohlinde, D., and Von Sonntag, C.: HO<sub>2</sub> Elimination from α-hydroxyalkylperoxy radicals in aqueous solution, *Photochem. Photobiol.*, 28, 639-643, 1978.
- Chevallier, E., Jolibois, R. D., Meunier, N., Carlier, P., and Monod, A.: "Fenton-like" reactions of methylhydroperoxide and ethylhydroperoxide with Fe<sup>2+</sup> in liquid aerosols under tropospheric conditions, *Atmos. Environ.*, 38, 921-933, 2004.
- DeCosta, D. P., and Pincock, J. A.: Control of product distribution by Marcus type electron-transfer rates for the radical pair generated in benzylic ester photochemistry, *J. Am. Chem. Soc.*, 111, 8948-8950, 1989.
- De Filippis, P., Scarsella, M., and Verdone, N.: Peroxyformic acid formation: a kinetic study, *Ind. Eng. Chem. Res.*, 48, 1372-1375, 2009.
- Doussin, J. F., and Monod, A.: Structure–activity relationship for the estimation of OH-oxidation rate constants of carbonyl compounds in the aqueous phase, *Atmos. Chem. Phys.*, 13, 11625-11641, 10.5194/acp-13-11625-2013, 2013.
- Ervens, B., Gligorovski, S., and Herrmann, H.: Temperature-dependent rate constants for hydroxyl radical reactions with organic compounds in aqueous solutions, *Phys. Chem. Chem. Phys.*, 5, 2003.
- Hilborn, J. W., and Pincock, J. A.: Rates of decarboxylation of acyloxy radicals formed in the photocleavage of substituted 1-naphthylmethyl alkanoates, *J. Am. Chem. Soc.*, 113, 2683-2686, 1991.



- 
- Le Henaff, P.: Methodes d'étude et propriétés des hydrates hémiacétals et hémithioacétals dérivés des aldéhydes et cétones, P. Bull. Soc. Chim. Fr., 11, 4687-4698, 1968.
- Jacobi, H. W., Herrmann, H., and Zellner, R.: Kinetic investigation of the  $\text{Cl}_2^-$  radical in the aqueous phase, in: Air Pollution research Report 57: Homogenous and heterogenous chemical processes in the troposphere, edited by: Becker, K. H., CEC, Brussels, 1996.
- Martell, A. E., and Smith, R. M.: Critical stability constants. Volume 3 : Other organic ligands., Plenum, New York, 1977.
- Moorhead, E. G., and Sutin, N.: Rate and equilibrium constants for the formation of the monooxalate complex of iron(III), Inorg. Chem., 5, 1866-1871, 1966.
- Monod, A., Chevallier, E., Durand Jolibois, R., Doussin, J. F., Picquet-Varrault, B., and Carlier, P.: Photooxidation of methylhydroperoxide and ethylhydroperoxide in the aqueous phase under simulated cloud droplet conditions, Atmos. Environ., 41, 2412-2426, 2007.
- Neta, P., and Huie, R. E.: Rate constants for reactions of nitrogen oxide ( $\text{NO}_3$ ) radicals in aqueous solutions, J. Phys. Chem., 90, 4644-4648, 1986.
- Neta, P., Huie, R., and Ross, A.: Rate constants for reactions of peroxy radicals in fluid solutions, J. Phys. Chem. Ref. Data, 19, 413, 1990.
- Padmaja, S., Neta, P., and Huie, R. E.: Rate constant for some reactions of inorganic radicals with inorganic ions. Temperature dependence and solvent dependence, J. Phys. Chem., 25, 445-455, 1993.
- Piesiak, A., Schuchmann, M. N., Zegota, H., and von Sonntag, C.:  $\beta$ -Hydroxyethylperoxy radicals: A study of the  $\gamma$ -radiolysis and pulse radiolysis of ethylene in oxygenated aqueous solutions, Z. Naturforsch., 39b, 1262-1267, 1984.
- Rousse, D., and George, C.: A novel long path photolysis cell-application to the reactivity of selected organic compounds toward the nitrate radical ( $\text{NO}_3$ ), Phys. Chem. Chem. Phys., 6, 3408-3414, 2004.
- Schaefer, T.: Kinetische und mechanistische Untersuchungen der radikalischen Oxidation organischer kurzkettiger Carbonylverbindungen in wässriger Lösung (Kinetic and mechanistic investigations of the radical oxidation of organic short-chain carbonyl compounds in the aqueous phase), Faculty of Chemistry and Mineralogy of the University of Leipzig, Leipzig, 174 pp., 2012.
- Schuchmann, H. P., and von Sonntag, C.: Methylperoxy radicals: a study of the  $\gamma$ -radiolysis of methane in oxygenated aqueous solution, Z. Naturforsch., 39b, 217-221, 1984.
- Schuchmann, M. N., Zegota, H., and Von Sonntag, C.: Acetate peroxy radicals  $\cdot\text{O}_2\text{CH}_2\text{CO}_2^-$ : A study on the  $\gamma$ -radiolysis and pulse radiolysis of acetate in oxygenated aqueous solutions, *ibid.*, 40b, 215-221, 1985.
- Schuchmann, M. N., and Von Sonntag, C.: The rapid hydration of the acetyl radical. A pulse radiolysis study of acetaldehyde in aqueous solution, J. Am. Chem. Soc., 110, 5698-5701, 1988.
- Von Sonntag, C.: The chemical basis of radiation biology, Taylor & Francis, 1987.
- Zegota, H., Schuchmann, M. N., and Von Sonntag, C.: Elucidation of the mechanism of peroxy radical reactions in aqueous solutions using the pulse radiolysis technique, J. Radioanal. Nucl. Chem., 101, 199-207, 1986.

## Equilibria

| Species                                                                                                       |       | K <sub>a</sub> or K <sub>h</sub> | -ΔH/R<br>(K) | References                               | Notes                                                                                |
|---------------------------------------------------------------------------------------------------------------|-------|----------------------------------|--------------|------------------------------------------|--------------------------------------------------------------------------------------|
| <b>C1 compounds</b>                                                                                           |       |                                  |              |                                          |                                                                                      |
| <b>Formaldehyde</b>                                                                                           |       |                                  |              |                                          |                                                                                      |
| CH <sub>2</sub> O + H <sub>2</sub> O ↔ CH <sub>2</sub> (OH)(OH)                                               | T(18) | 1.3 10 <sup>3</sup>              | 3777         | Winkelman et al., 2002                   |                                                                                      |
| CHO(OO <sup>•</sup> ) + H <sub>2</sub> O ↔ CH(OH)(OH)(OO <sup>•</sup> )                                       | T(19) | 1.3 10 <sup>3</sup>              | 3777         |                                          | 1<br>= K <sub>h</sub> (CH <sub>2</sub> O/CH <sub>2</sub> (OH)(OH))                   |
| <b>Formic acid</b>                                                                                            |       |                                  |              |                                          |                                                                                      |
| CHO(OH) ↔ CHO(O <sup>-</sup> ) + H <sup>+</sup>                                                               | T(20) | 1.8 10 <sup>-4</sup>             | 150          | Prue and Read, 1966                      |                                                                                      |
| CO(OH)(OO <sup>•</sup> ) ↔ CO(O <sup>-</sup> )(OO <sup>•</sup> ) + H <sup>+</sup>                             | T(21) | 1.8 10 <sup>-4</sup>             | 150          |                                          | 2<br>= K <sub>a</sub> (CHO(O <sup>-</sup> )/CHO(OH))                                 |
| <b>C2 compounds</b>                                                                                           |       |                                  |              |                                          |                                                                                      |
| <b>Acetaldehyde</b>                                                                                           |       |                                  |              |                                          |                                                                                      |
| CH <sub>3</sub> CHO + H <sub>2</sub> O ↔ CH <sub>3</sub> CH(OH)(OH)                                           | T(22) | 1.2                              |              | Buschmann et al., 1980                   |                                                                                      |
| CH <sub>3</sub> CO(OO <sup>•</sup> ) + H <sub>2</sub> O ↔ CH <sub>3</sub> C(OH)(OH)(OO <sup>•</sup> )         | T(23) | 1.2                              |              |                                          | 1<br>= K <sub>h</sub> (CH <sub>3</sub> CHO/CH <sub>3</sub> CH(OH)(OH))               |
| <b>Glycolaldehyde</b>                                                                                         |       |                                  |              |                                          |                                                                                      |
| CH <sub>2</sub> (OH)CHO + H <sub>2</sub> O ↔ CH <sub>2</sub> (OH)CH(OH)(OH)                                   | T(24) | 1.0 10 <sup>1</sup>              |              | Sørensen, 1972                           |                                                                                      |
| CH <sub>2</sub> (OH)CO(OO <sup>•</sup> ) + H <sub>2</sub> O ↔ CH <sub>2</sub> (OH)C(OH)(OH)(OO <sup>•</sup> ) | T(25) | 1.0 10 <sup>1</sup>              |              |                                          | 1<br>= K <sub>h</sub> (CH <sub>2</sub> (OH)CHO/CH <sub>2</sub> (OH)CH(OH)(OH))       |
| CH(OH)(OO <sup>•</sup> )CHO + H <sub>2</sub> O ↔ CH(OH)(OO <sup>•</sup> )CH(OH)(OH)                           | T(26) | 1.0 10 <sup>1</sup>              |              |                                          | 1<br>= K <sub>h</sub> (CH <sub>2</sub> (OH)CHO/CH <sub>2</sub> (OH)CH(OH)(OH))       |
| <b>Glyoxal</b>                                                                                                |       |                                  |              |                                          |                                                                                      |
| CHOCHO + H <sub>2</sub> O ↔ CHOCH(OH)(OH)                                                                     | T(27) | 8.5 10 <sup>-1</sup>             |              | Ruiz-Montoya and Rodriguez-Mellado, 1994 |                                                                                      |
| CHOCHO + 2 H <sub>2</sub> O ↔ CH(OH)(OH)CH(OH)(OH)                                                            | T(28) | 1.7 10 <sup>2</sup>              |              | Ruiz-Montoya and Rodriguez-Mellado, 1994 |                                                                                      |
| CHOCO(OO <sup>•</sup> ) + H <sub>2</sub> O ↔ CHOC(OH)(OH)(OO <sup>•</sup> )                                   | T(29) | 8.5 10 <sup>-1</sup>             |              |                                          | 1<br>= K <sub>h</sub> (CHOCHO/CHOCH(OH)(OH))                                         |
| CHOCO(OO <sup>•</sup> ) + 2 H <sub>2</sub> O ↔ CH(OH)(OH)C(OH)(OH)(OO <sup>•</sup> )                          | T(30) | 1.7 10 <sup>2</sup>              |              |                                          | 1<br>= K <sub>h</sub> (CHOCHO/CH(OH)(OH)CH(OH)(OH))                                  |
| <b>Hydroxyperacetic acid</b>                                                                                  |       |                                  |              |                                          |                                                                                      |
| CH <sub>2</sub> (OH)CO(OOH) ↔ CH <sub>2</sub> (OH)CO(OO <sup>-</sup> ) + H <sup>+</sup>                       | T(31) | 6.3 10 <sup>-9</sup>             |              |                                          | 2<br>= K <sub>a</sub> (CH <sub>3</sub> CO(OO <sup>-</sup> )/CH <sub>3</sub> CO(OOH)) |
| <b>Peracetic acid</b>                                                                                         |       |                                  |              |                                          |                                                                                      |
| CH <sub>3</sub> CO(OOH) ↔ CH <sub>3</sub> CO(OO <sup>-</sup> ) + H <sup>+</sup>                               | T(32) | 6.3 10 <sup>-9</sup>             |              | Schuchmann and Von Sonntag, 1988         |                                                                                      |

| Species                                                                                                           |       | K <sub>a</sub> or K <sub>h</sub> | -ΔH/R<br>(K) | References                | Notes                                                                                      |
|-------------------------------------------------------------------------------------------------------------------|-------|----------------------------------|--------------|---------------------------|--------------------------------------------------------------------------------------------|
| <b>Acetic acid</b>                                                                                                |       |                                  |              |                           |                                                                                            |
| CH <sub>3</sub> CO(OH) ↔ CH <sub>3</sub> CO(O <sup>-</sup> ) + H <sup>+</sup>                                     | T(33) | 1.7 10 <sup>-5</sup>             |              | Lide and Frederikse, 1995 |                                                                                            |
| <b>Oxalic acid</b>                                                                                                |       |                                  |              |                           |                                                                                            |
| CO(OH)CO(OH) ↔ CO(OH)CO(O <sup>-</sup> ) + H <sup>+</sup>                                                         | T(34) | 5.6 10 <sup>-2</sup>             |              | Martell and Smith, 1977   |                                                                                            |
| CO(OH)CO(O <sup>-</sup> ) ↔ CO(O <sup>-</sup> )CO(O <sup>-</sup> ) + H <sup>+</sup>                               | T(35) | 5.4 10 <sup>-5</sup>             |              | Martell and Smith, 1977   |                                                                                            |
| <b>2-hydroperoxyacetic acid</b>                                                                                   |       |                                  |              |                           |                                                                                            |
| CH <sub>2</sub> (OOH)CO(OH) ↔ CH <sub>2</sub> (OOH)CO(O <sup>-</sup> ) + H <sup>+</sup>                           | T(36) | 1.7 10 <sup>-5</sup>             |              |                           | 2<br>= K <sub>a</sub> (CH <sub>3</sub> CO(O <sup>-</sup> )/CH <sub>3</sub> CO(OH))         |
| CH <sub>2</sub> (OO <sup>•</sup> )CO(OH) ↔ CH <sub>2</sub> (OO <sup>•</sup> )CO(O <sup>-</sup> ) + H <sup>+</sup> | T(37) | 1.7 10 <sup>-5</sup>             |              |                           | 2<br>= K <sub>a</sub> (CH <sub>3</sub> CO(O <sup>-</sup> )/CH <sub>3</sub> CO(OH))         |
| CH(OOH)(OO <sup>•</sup> )CO(OH) ↔ CH(OOH)(OO <sup>•</sup> )CO(OH) + H <sup>+</sup>                                | T(38) | 1.7 10 <sup>-5</sup>             |              |                           | 2<br>= K <sub>a</sub> (CH <sub>3</sub> CO(O <sup>-</sup> )/CH <sub>3</sub> CO(OH))         |
| <b>Glycolic acid</b>                                                                                              |       |                                  |              |                           |                                                                                            |
| CH <sub>2</sub> (OH)CO(OH) ↔ CH <sub>2</sub> (OH)CO(O <sup>-</sup> ) + H <sup>+</sup>                             | T(39) | 1.5 10 <sup>-4</sup>             |              | Lide and Frederikse, 1995 |                                                                                            |
| CH(OH)(OO <sup>•</sup> )CO(OH) ↔ CH(OH)(OO <sup>•</sup> )CO(O <sup>-</sup> ) + H <sup>+</sup>                     | T(40) | 1.5 10 <sup>-4</sup>             |              |                           | 2<br>= K <sub>a</sub> (CH <sub>2</sub> (OH)CO(O <sup>-</sup> )/CH <sub>2</sub> (OH)CO(OH)) |
| <b>Glyoxylic acid</b>                                                                                             |       |                                  |              |                           |                                                                                            |
| CHOCO(OH) ↔ CHOCO(O <sup>-</sup> ) + H <sup>+</sup>                                                               | T(41) | 6.6 10 <sup>-4</sup>             |              | Buxton et al., 1997       |                                                                                            |
| CHOCO(OH) + H <sub>2</sub> O ↔ CH(OH)(OH)CO(OH)                                                                   | T(42) | 1.1 10 <sup>3</sup>              |              | Tur'yan, 1998             |                                                                                            |
| CHOCO(O <sup>-</sup> ) + H <sub>2</sub> O ↔ CH(OH)(OH)CO(O <sup>-</sup> )                                         | T(43) | 1.7 10 <sup>1</sup>              |              | Tur'yan, 1998             |                                                                                            |
| CO(OH)CO(OO <sup>•</sup> ) ↔ CO(O <sup>-</sup> )CO(OO <sup>•</sup> ) + H <sup>+</sup>                             | T(44) | 6.6 10 <sup>-4</sup>             |              |                           | 2<br>= K <sub>a</sub> (CHOCO(O <sup>-</sup> )/CHOCO(OH))                                   |
| CO(OH)CO(OO <sup>•</sup> ) + H <sub>2</sub> O ↔ CO(OH)C(OH)(OH)(OO <sup>•</sup> )                                 | T(45) | 1.1 10 <sup>3</sup>              |              |                           | 2<br>= K <sub>h</sub> (CHOCO(OH)/CH(OH)(OH)CO(OH))                                         |
| CO(O <sup>-</sup> )CO(OO <sup>•</sup> ) + H <sub>2</sub> O ↔ CO(O <sup>-</sup> )C(OH)(OH)(OO <sup>•</sup> )       | T(46) | 1.7 10 <sup>1</sup>              |              |                           | = K <sub>h</sub> (CHOCO(O <sup>-</sup> )/CH(OH)(OH)CO(O <sup>-</sup> ))                    |
| <b>R(OO<sup>•</sup>) from C3 oxidation</b>                                                                        |       |                                  |              |                           |                                                                                            |
| CHOCH <sub>2</sub> (OO <sup>•</sup> ) + H <sub>2</sub> O ↔ CH(OH)(OH)CH <sub>2</sub> (OO <sup>•</sup> )           | T(47) | 1.0 10 <sup>1</sup>              |              |                           | 3<br>= K <sub>h</sub> (CH <sub>2</sub> (OH)CHO/CH <sub>2</sub> (OH)CH(OH)(OH))             |

1 - For peroxy radicals, we assumed that the hydration constant is similar to the parent species.

2 - For peroxy radicals, we assumed that the acidity constant is similar to the parent species.

3 - This radical is produced in the oxidation of 3-oxopropionic acid (C3).

## Henry's law constants

| Species                                                                |       | H (298K)<br>(M atm <sup>-1</sup> ) | -ΔH/R<br>(K) | References                      | Notes |
|------------------------------------------------------------------------|-------|------------------------------------|--------------|---------------------------------|-------|
| <b>C1 compounds</b>                                                    |       |                                    |              |                                 |       |
| <b>HMHP (Hydro Methyl Hydro Peroxide)</b><br>CH <sub>2</sub> (OOH)(OH) | T(18) | 1.7 10 <sup>6</sup>                | 9870         | Sander, 2015                    |       |
| <b>Performic acid</b><br>CHO(OOH)                                      | T(19) | 4.7 10 <sup>5</sup>                | 6014         | Estimated                       | 1 - 2 |
| <b>MHP (Methyl Hydro Peroxide)</b><br>CH <sub>3</sub> (OOH)            | T(20) | 3.1 10 <sup>2</sup>                | 5240         | O'Sullivan et al., 1996         |       |
| <b>Methanol</b><br>CH <sub>3</sub> (OH)                                | T(21) | 2.2 10 <sup>2</sup>                | 5210         | Snider and Dawson,<br>1985      |       |
| <b>Formaldehyde</b><br>CH <sub>2</sub> O                               | T(22) | 3.2 10 <sup>3</sup>                | 7100         | Sander, 2015                    | 3     |
| <b>Formic acid</b><br>CHO(OH)                                          | T(23) | 8.9 10 <sup>3</sup>                | 6100         | Johnson et al., 1996            |       |
| <b>Methyl nitrate</b><br>CH <sub>3</sub> (ONO <sub>2</sub> )           | T(24) | 2.0                                | 4740         | Sander, 2015                    |       |
| <b>C2 compounds</b>                                                    |       |                                    |              |                                 |       |
| <b>Ethanol</b><br>CH <sub>3</sub> CH <sub>2</sub> (OH)                 | T(25) | 2.0 10 <sup>2</sup>                | 6630         | Snider and Dawson,<br>1985      |       |
| <b>Ethylene glycol</b><br>CH <sub>2</sub> (OH)CH <sub>2</sub> (OH)     | T(26) | 4.0 10 <sup>6</sup>                |              | Bone et al., 1983               |       |
| <b>Acetaldehyde</b><br>CH <sub>3</sub> CHO                             | T(27) | 1.3 10 <sup>1</sup>                | 5890         | Sander, 2015                    | 3     |
| CH <sub>3</sub> CO(OO <sup>•</sup> )                                   | T(28) | 1.0 10 <sup>-1</sup>               |              | Sander, 2015                    |       |
| <b>Glycolaldehyde</b><br>CH <sub>2</sub> (OH)CHO                       | T(29) | 4.1 10 <sup>4</sup>                | 3850         | Betterton and<br>Hoffmann, 1988 | 3     |
| <b>Glyoxal</b><br>CHOCHO                                               | T(30) | 4.2 10 <sup>5</sup>                | 7480         | Ip et al., 2009                 | 3     |
| <b>Peracetic acid</b><br>CH <sub>3</sub> CO(OOH)                       | T(31) | 8.4 10 <sup>2</sup>                | 5300         | O'Sullivan et al., 1996         |       |
| <b>Hydroxyperacetic acid</b><br>CH <sub>2</sub> (OH)CO(OOH)            | T(32) | 4.8 10 <sup>4</sup>                | 6014         | Estimated                       | 1 - 2 |
| <b>Acetic acid</b><br>CH <sub>3</sub> CO(OH)                           | T(33) | 4.1 10 <sup>3</sup>                | 6200         | Sander, 2015                    |       |

| Species                                                                                  |       | H (298K)<br>(M atm <sup>-1</sup> ) | -ΔH/R<br>(K) | References                    | Notes |
|------------------------------------------------------------------------------------------|-------|------------------------------------|--------------|-------------------------------|-------|
| <b>Ethyl hydroperoxide</b><br>CH <sub>3</sub> CH <sub>2</sub> (OOH)                      | T(34) | 3.4 10 <sup>2</sup>                |              | O'Sullivan et al., 1996       |       |
| <b>Oxalic acid</b><br>CO(OH)CO(OH)                                                       | T(35) | 5.0 10 <sup>8</sup>                |              | Saxena and Hildemann,<br>1996 |       |
| <b>2-hydroperoxy acetic acid</b><br>CH <sub>2</sub> (OOH)CO(OH)                          | T(36) | 1.5 10 <sup>6</sup>                | 6014         | Estimated                     | 1 - 2 |
| <b>Glycolic acid</b><br>CH <sub>2</sub> (OH)CO(OH)                                       | T(37) | 2.4 10 <sup>4</sup>                | 4030         | Ip et al., 2009               |       |
| <b>Glyoxylic acid</b><br>CHOCO(OH)                                                       | T(38) | 9.0 10 <sup>9</sup>                |              | Saxena and Hildemann,<br>1996 | 3     |
| <b>PAN</b><br>CH <sub>3</sub> CO(OONO <sub>2</sub> )                                     | T(39) | 2.8                                | 5730         | Sander, 2015                  |       |
| <b>Ethyl nitrate</b><br>CH <sub>3</sub> CH <sub>2</sub> (ONO <sub>2</sub> )              | T(40) | 1.6                                | 5360         | Sander, 2015                  |       |
| <b>2-hydroxyethyl nitrate</b><br>CH <sub>2</sub> (OH)CH <sub>2</sub> (ONO <sub>2</sub> ) | T(41) | 4.0 10 <sup>4</sup>                |              | Sander, 2015                  |       |

1 - Estimated by the SAR GROMHE (Raventos-Duran et al., 2010).

2 - When unavailable, the temperature dependence (enthalpy of dissolution) is set at 50 kJ mol<sup>-1</sup>; -ΔH/R = 6014 K.

3 - Effective Henry's law constant.

## Accommodation coefficients

| Species                                                                |       | $\alpha$<br>(298K)   | $-\Delta H$<br>(J/mol) | $-\Delta S$<br>(J/mol/K) | References              | Notes                              |
|------------------------------------------------------------------------|-------|----------------------|------------------------|--------------------------|-------------------------|------------------------------------|
| <b>C1 compounds</b>                                                    |       | 1                    |                        |                          |                         |                                    |
| <b>HMHP (Hydro Methyl Hydro Peroxide)</b><br>CH <sub>2</sub> (OOH)(OH) | T(18) | 5.0 10 <sup>-2</sup> |                        |                          | Estimated               | 2                                  |
| <b>Performic acid</b><br>CHO(OOH)                                      | T(19) | 5.0 10 <sup>-2</sup> |                        |                          | Estimated               | 2                                  |
| <b>MHP (Methyl Hydroperoxide)</b><br>CH <sub>3</sub> (OOH)             | T(20) | 5.0 10 <sup>-3</sup> | 2.7 10 <sup>4</sup>    | 1.4 10 <sup>2</sup>      | Davidovits et al., 2011 |                                    |
| <b>Methanol</b><br>CH <sub>3</sub> (OH)                                | T(21) | 1.7 10 <sup>-2</sup> | 3.3 10 <sup>4</sup>    | 1.5 10 <sup>2</sup>      | Davidovits et al., 2011 |                                    |
| <b>Formaldehyde</b><br>CH <sub>2</sub> O                               | T(22) | 4.0 10 <sup>-2</sup> |                        |                          | Sander, 2015            | Mean value<br>between 260-<br>270K |
| <b>Formic acid</b><br>CHO(OH)                                          | T(23) | 1.5 10 <sup>-2</sup> | 3.3 10 <sup>4</sup>    | 1.5 10 <sup>2</sup>      | Davidovits et al., 2011 |                                    |
| <b>Methyl nitrate</b><br>CH <sub>3</sub> (ONO <sub>2</sub> )           | T(24) | 5.0 10 <sup>-2</sup> |                        |                          | Estimated               | 2                                  |
| <b>C2 compounds</b>                                                    |       |                      |                        |                          |                         |                                    |
| <b>Ethanol</b><br>CH <sub>3</sub> CH <sub>2</sub> (OH)                 | T(25) | 9.0 10 <sup>-3</sup> | 4.6 10 <sup>4</sup>    | 1.9 10 <sup>2</sup>      | Davidovits et al., 2011 |                                    |
| <b>Ethylene glycol</b><br>CH <sub>2</sub> (OH)CH <sub>2</sub> (OH)     | T(26) | 3.3 10 <sup>-2</sup> | 2.2 10 <sup>4</sup>    | 1.0 10 <sup>2</sup>      | Davidovits et al., 2011 |                                    |
| <b>Acetaldehyde</b><br>CH <sub>3</sub> CHO                             | T(27) | 3.0 10 <sup>-2</sup> |                        |                          | Sander, 2015            | Measured at<br>267K                |
| CH <sub>3</sub> CO(OO*)                                                | T(28) | 5.0 10 <sup>-2</sup> |                        |                          | Estimated               | 2                                  |
| <b>Glycolaldehyde</b><br>CH <sub>2</sub> (OH)CHO                       | T(29) | 5.0 10 <sup>-2</sup> |                        |                          | Estimated               | 2                                  |
| <b>Glyoxal</b><br>CHOCHO                                               | T(30) | 1.0 10 <sup>-2</sup> |                        |                          | Sander, 2015            | Mean value<br>between 260-<br>285K |
| <b>Peracetic acid</b><br>CH <sub>3</sub> CO(OOH)                       | T(31) | 5.0 10 <sup>-2</sup> |                        |                          | Estimated               | 2                                  |
| <b>Hydroxyperacetic acid</b><br>CH <sub>2</sub> (OH)CO(OOH)            | T(32) | 5.0 10 <sup>-2</sup> |                        |                          | Estimated               | 2                                  |

| Species                                                 |       | $\alpha$<br>(298K)   | $-\Delta H$<br>(J/mol) | $-\Delta S$<br>(J/mol/K) | References              | Notes            |
|---------------------------------------------------------|-------|----------------------|------------------------|--------------------------|-------------------------|------------------|
| <b>Acetic acid</b>                                      |       |                      |                        |                          |                         |                  |
| CH <sub>3</sub> CO(OH)                                  | T(33) | 2.0 10 <sup>-2</sup> | 3.4 10 <sup>4</sup>    | 1.5 10 <sup>2</sup>      | Davidovits et al., 2011 |                  |
| <b>Ethyl hydroperoxide</b>                              |       |                      |                        |                          |                         |                  |
| CH <sub>3</sub> CH <sub>2</sub> (OOH)                   | T(34) | 5.0 10 <sup>-2</sup> |                        |                          | Estimated               | 2                |
| <b>Oxalic acid</b>                                      |       |                      |                        |                          |                         |                  |
| CO(OH)CO(OH)                                            | T(35) | 5.0 10 <sup>-2</sup> |                        |                          | Estimated               | 2                |
| <b>2-hydroperoxy acetic acid</b>                        |       |                      |                        |                          |                         |                  |
| CH <sub>2</sub> (OOH)CO(OH)                             | T(36) | 5.0 10 <sup>-2</sup> |                        |                          | Estimated               | 2                |
| <b>Glycolic acid</b>                                    |       |                      |                        |                          |                         |                  |
| CH <sub>2</sub> (OH)CO(OH)                              | T(37) | 5.0 10 <sup>-2</sup> |                        |                          | Estimated               | 2                |
| <b>Glyoxylic acid</b>                                   |       |                      |                        |                          |                         |                  |
| CHOCO(OH)                                               | T(38) | 5.0 10 <sup>-2</sup> |                        |                          | Estimated               | 2                |
| <b>PAN</b>                                              |       |                      |                        |                          |                         |                  |
| CH <sub>3</sub> CO(OONO <sub>2</sub> )                  | T(39) | 1.0 10 <sup>-3</sup> |                        |                          | Kirchner et al., 1990   | Measured at 282K |
| <b>Ethyl nitrate</b>                                    |       |                      |                        |                          |                         |                  |
| CH <sub>3</sub> CH <sub>2</sub> (ONO <sub>2</sub> )     | T(40) | 5.0 10 <sup>-2</sup> |                        |                          | Estimated               | 2                |
| <b>2-hydroxyethyl nitrate</b>                           |       |                      |                        |                          |                         |                  |
| CH <sub>2</sub> (OH)CH <sub>2</sub> (ONO <sub>2</sub> ) | T(41) | 5.0 10 <sup>-2</sup> |                        |                          | Estimated               | 2                |

1 -  $\alpha$  can be calculated with  $\Delta H$  and  $\Delta S$ ; this allows considering the temperature dependency of  $\alpha$  following Jayne et al. (1997) :  $\frac{\alpha}{1-\alpha} = \exp\left(\frac{-\Delta G}{RT}\right)$ ;  $\Delta G = \Delta H - T\Delta S$

2 - Estimated equal 5.0 10<sup>-2</sup> following Lelieveld and Crutzen (1991) and Davidovits et al. (2011).

#### References:

Davidovits, P., Kolb, C. E., Williams, L. R., Jayne, J. T., and Worsnop, D. R.: Update 1 of: Mass accommodation and chemical reactions at gas-liquid interfaces, Chem. Rev., 111, 2011.  
Lelieveld, J., and Crutzen, P. J.: The role of clouds in tropospheric photochemistry, J. Atmos. Chem., 12, 229-267, 1991.

## REFERENCES

---

- Adams, G. E., and Willson, R. L.: Pulse radiolysis studies on the oxidation of organic radicals in aqueous solution, *Trans. Faraday Soc.*, 65, 1969.
- Betterton, E. A., and Hoffmann, M. R.: Henry's law constants of some environmentally important aldehydes, *Environ. Sci. Tech.*, 22, 1415-1418, 1988.
- Bone, R., Cullis, P., and Wolfenden, R.: Solvent effects on equilibria of addition of nucleophiles to acetaldehyde and the hydrophilic character of diols, *J. Am. Chem. Soc.*, 105, 1339-1343, 1983.
- Buschmann, H.-J., Földner, H.-H., and Knoche, W.: The reversible hydration of carbonyl compounds in aqueous solution. Part I, the keto/gem-diol equilibrium, *Berichte der Bunsengesellschaft für physikalische Chemie*, 84, 41-44, 1980.
- Buxton, G., Greenstock, C., Helman, W., and Ross, A.: Critical Review of rate constants for reactions of hydrated electrons, hydrogen atoms and hydroxyl radicals (OH/HO<sub>2</sub>) in Aqueous Solution, *J. Phys. Chem. Ref. Data*, 17, 513, 1988.
- Buxton, G. V., Salmon, G. A., and Wood, N. D.: A pulse radiolysis study of the chemistry of oxysulfur radicals in aqueous solution, in: *Proceedings of the Fifth European Symposium: Physico-Chemical Behavior of Atmospheric Pollutants*, edited by: Restelli, G., and Angeletti, G., Kluwer, Dordrecht, 245-250, 1990.
- Buxton, G. V., N. Malone, T. N., and Salmon, G. A.: Oxidation of glyoxal initiated by OH in oxygenated aqueous solution, *J. Chem. Soc., Faraday Transactions*, 93, 2889-2891, 1997.
- Buxton, G. V., Bydder, M., Salmon, G. A., and Williams, J.: The reactivity of chlorine atoms in aqueous solution, Part III. The reactions of Cl with solutes, *Phys. Chem. Chem. Phys.*, 2, 237-245, 2000.
- Chevallier, E., Jolibois, R. D., Meunier, N., Carlier, P., and Monod, A.: "Fenton-like" reactions of methylhydroperoxide and ethylhydroperoxide with Fe<sup>2+</sup> in liquid aerosols under tropospheric conditions, *Atmos. Environ.*, 38, 921-933, 2004.
- Chin, M., and Wine, P. H.: A temperature-dependent competitive kinetics study of the aqueous-phase reactions of OH radicals with formate, formic acid, acetate, acetic acid, and hydrated formaldehyde, in: *Aquatic and Surface Photochemistry*, CRC, Boca Raton, 85-98, 1994.
- Clifton, C. L., and Huie, R. E.: Rate constants for hydrogen abstraction reactions of the sulfate radical, SO<sub>4</sub><sup>-</sup>, Alcohols, *Inter. J. Chem. Kin.*, 21, 677-687, 1989.
- Clifton, C. L., and Huie, R. E.: Rate constants for some hydrogen abstraction reactions of the carbonate radical, *Inter. J. Chem. Kin.*, 25, 199-203, 1993.
- Davidovits, P., Kolb, C. E., Williams, L. R., Jayne, J. T., and Worsnop, D. R.: Update 1 of: Mass accommodation and chemical reactions at gas-liquid interfaces, *Chem. Rev.*, 111, 2011.
- De Filippis, P., Scarsella, M., and Verdone, N.: Peroxyformic acid formation: a kinetic study, *Ind. Eng. Chem. Res.*, 48, 1372-1375, 2009.
- De Semainville, P., Hoffmann, D., George, C., and Herrmann, H.: Study of nitrate radical (NO<sub>3</sub>) reactions with carbonyls and acids in aqueous solution as a function of temperature, *Phys. Chem. Chem. Phys.*, 9, 958-968, 2007.
- Elliot, A. J., and McCracken, D. R.: Effect of temperature on OH reactions and equilibria: A pulse radiolysis study, *Inter. J. Rad. Appl. Instru. C. Radiation Physics and Chemistry*, 33, 69-74, 1989.
- Ervens, B., Gligorovski, S., and Herrmann, H.: Temperature-dependent rate constants for hydroxyl radical reactions with organic compounds in aqueous solutions, *Phys. Chem. Chem. Phys.*, 5, 2003.
- Exner, M., Herrmann, H., Michel, J. W., and Zellner, R.: Laser pulse initiated measurements of NO<sub>3</sub> reactions with S(IV) and organic compounds in aqueous solutions, in: *Proceeding of EUROTRAC Symposium '92: Photo-oxidant: Precursors and Products*, edited by: Borrell, P. M., Cvitas, T., and Seiler, W., SPB Academic Publishing, The Hague, 615-618, 1993.
- Exner, M., Herrmann, H., and Zellner, R.: Rate constants for the reactions of the NO<sub>3</sub> radical with HCOOH/HCOO<sup>-</sup> and CH<sub>3</sub>COOH/CH<sub>3</sub>COO<sup>-</sup> in aqueous solution between 278 and 328 K, *J. Atmos. Chem.*, 18, 359-378, 1994.
- Faust, B. C., and Zepp, R. G.: Photochemistry of aqueous iron(III)-polycarboxylate complexes: roles in the chemistry of atmospheric and surface waters, *Environ. Sci. Tech.*, 27, 2517-2522, 1993.
- Fisher, M. M., and Hamill, W. H.: Electronic processes in pulse-irradiated aqueous and alcoholic systems, *J. Phys. Chem.*, 77, 171-177, 1973.
- George, C., Rassy, H. E., and Chovelon, J. M.: Reactivity of selected volatile organic compounds (VOCs) toward the sulfate radical (SO<sub>4</sub><sup>-</sup>), *International Journal of Chemical Kinetics*, 33, 539-547, 2001.
- Grgić, I., Podkrajšek, B., Barzaghi, P., and Herrmann, H.: Scavenging of SO<sub>4</sub><sup>-</sup> radical anions by mono- and dicarboxylic acids in the Mn(II)-catalyzed S(IV) oxidation in aqueous solution, *Atmos. Environ.*, 41, 9187-9194, 2007.
- Herrmann, H., and Zellner, R.: Reaction of NO<sub>3</sub> radicals in aqueous solution, in: *N-Centered Radicals*, edited by: Alfassi, Z., Wiley, London, 291-343, 1998.
- Herrmann, H., Reese, A., Ervens, B., Wicktor, F., and Zellner, R.: Laboratory and modelling studies of tropospheric multiphase conversions involving some C1 and C2 peroxy radicals, *Phys. Chem. Earth, Part B*, 24, 287-290, 1999.
- Hislop, K. A., and Bolton, J. R.: The photochemical generation of hydroxyl radicals in the UV-vis/Ferrioxalate/H<sub>2</sub>O<sub>2</sub> system, *Environ. Sci. Tech.*, 33, 3119-3126, 1999.
- Hoffmann, D., Weigert, B., Barzaghi, P., and Herrmann, H.: Reactivity of poly-alcohols towards OH, NO<sub>3</sub> and SO<sub>4</sub><sup>-</sup> in aqueous solution, *Phys. Chem. Chem. Phys.*, 11, 9351-9363, 2009.
- Huie, R. E., and Clifton, C. L.: Temperature dependence of the rate constants for reactions of the sulfate radical, SO<sub>4</sub><sup>-</sup>, with anions, *J. Phys. Chem.*, 94, 8561-8567, 1990.
- Huie, R. E., and Clifton, C. L.: Kinetics of the self-reaction of hydroxymethylperoxy radicals, *Chem. Phys. Lett.*, 205, 163-167, 1993.
- Ip, H. S. S., Huang, X. H. H., and Yu, J. Z.: Effective Henry's law constants of glyoxal, glyoxylic acid, and glycolic acid, *Geophys. Res. Lett.*, 36, L01802, 2009.
- Jacobi, H. W., Herrmann, H., and Zellner, R.: Kinetic investigation of the Cl<sub>2</sub><sup>-</sup> radical in the aqueous phase, in: *Air Pollution research Report 57: Homogenous and heterogenous chemical processes in the troposphere*, edited by: Becker, K. H., CEC, Brussels, 1996.
- Jacobi, H. W., Wicktor, F., Herrmann, H., and Zellner, R.: A laser flash photolysis study of reactions of the Cl<sub>2</sub><sup>-</sup> radical anion with oxygenated hydrocarbons in aqueous solution, *Inter. J. Chem. Kin.*, 31, 169-181, 1999.
- Jacobsen, F., Holcman, J., and Sehested, K.: Reactions of the ferryl ion with some compounds found in cloud water, *Intern. J. Chem. Kin.*, 30, 215-221, 1998.
- Johnson, B. J., Betterton, E. A., and Craig, D.: Henry's law coefficients of formic and acetic acids, *J. Atmos. Chem.*, 24, 113-119, 1996.



Khaikin, G. I., Alfassi, Z. B., Huie, R. E., and Neta, P.: Oxidation of ferrous and ferrocyanide ions by peroxy radicals, *J. Phys. Chem.*, 100, 7072-7077, 1996.

Kirchner, W., Welter, F., Bongartz, A., Kames, J., Schweighoefer, S., and Schurath, U.: Trace gas exchange at the air/water interface: Measurements of mass accommodation coefficients, *J. Atmos. Chem.*, 10, 427-449, 1990.

Kuz'min, V. A.: Reaction of the  $\text{CO}_3^-$  and  $\text{SiO}_3^-$  radical anions, *High Ener. Chem*, 6, 338-339, 1972.

Lide, D. R., and Frederikse, H. P. R.: *CRC Handbook of Chemistry and Physics*, 76th Edition, edited by: press, C., Boca Raton, FL, 1995.

Lind, J. A., Lazrus, A. L., and Kok, G. L.: Aqueous phase oxidation of sulfur(IV) by hydrogen peroxide, methylhydroperoxide, and peroxyacetic acid, *J. Geophys. Res.*, 92, 4171-4177, 1987.

Long, Y., Charbouillot, T., Brigante, M., Mailhot, G., Delort, A.-M., Chaumerliac, N., and Deguillaume, L.: Evaluation of modeled cloud chemistry mechanism against laboratory irradiation experiments: The  $\text{H}_2\text{O}_2$ /iron/carboxylic acid chemical system, *Atmos. Environ.*, 77, 686-695, 2013.

Martell, A. E., and Smith, R. M.: *Critical stability constants. Volume 3 : Other organic ligands.*, Plenum, New York, 1977.

Monod, A., Poulain, L., Grubert, S., Voisin, D., and Wortham, H.: Kinetics of OH-initiated oxidation of oxygenated organic compounds in the aqueous phase: new rate constants, structure-activity relationships and atmospheric implications, *Atmos. Environ.*, 39, 7667-7688, 2005.

Monod, A., Chevallier, E., Durand Jolibois, R., Doussin, J. F., Picquet-Varrault, B., and Carlier, P.: Photooxidation of methylhydroperoxide and ethylhydroperoxide in the aqueous phase under simulated cloud droplet conditions, *Atmos. Environ.*, 41, 2412-2426, 2007.

Moorhead, E. G., and Sutin, N.: Rate and equilibrium constants for the formation of the monooxalate complex of iron(III), *Inorg. Chem.*, 5, 1866-1871, 1966.

Mulazzani, Q. G., D'Angelantonio, M., Venturi, M., Hoffman, M. Z., and Rodgers, M. A. J.: Interaction of formate and oxalate ions with radiation-generated radicals in aqueous solution. Methylviologen as a mechanistic probe, *J. Phys. Chem.*, 90, 5347-5352, 1986.

Neta, P., Huie, R., and Ross, A.: Rate constants for reactions of peroxy radicals in fluid solutions, *J. Phys. Chem. Ref. Data*, 19, 413, 1990.

O'Sullivan, D. W., Lee, M., Noone, B. C., and Heikes, B. G.: Henry's law constant determinations for hydrogen peroxide, methyl hydroperoxide, hydroxymethyl hydroperoxide, ethyl hydroperoxide, and peroxyacetic acid, *J. Phys. Chem.*, 100, 3241-3247, 1996.

Piesiak, A., Schuchmann, M. N., Zegota, H., and von Sonntag, C.:  $\beta$ -Hydroxyethylperoxy radicals: A study of the  $\gamma$ -radiolysis and pulse radiolysis of ethylene in oxygenated aqueous solutions, *Z. Naturforsch.*, 39b, 1262-1267, 1984.

Prue, J. E., and Read, A. J.: Acidity constant of formic acid, *Trans. Faraday Soc.*, 62, 1271-1274, 1966.

Rousse, D., and George, C.: A novel long path photolysis cell-application to the reactivity of selected organic compounds toward the nitrate radical ( $\text{NO}_3$ ), *Phys. Chem. Chem. Phys.*, 6, 3408-3414, 2004.

Ruiz-Montoya, M., and Rodriguez-Mellado, J. M.: Use of convolutive potential sweep voltammetry in the calculation of hydration equilibrium constants of  $\alpha$ -dicarbonyl compounds, *J. Electroanal. Chem.*, 370, 183-187, 1994.

Sander, R.: Compilation of Henry's law constants (version 4.0) for water as solvent, *Atmos. Chem. Phys.*, 15, 4399-4981, 10.5194/acp-15-4399-2015, 2015.

Saxena, P., and Hildemann, L. M.: Water-soluble organics in atmospheric particles: A critical review of the literature and application of thermodynamics to identify candidate compounds, *J. Atmos. Chem.*, 24, 57-109, 1996.

Schaefer, T.: Kinetische und mechanistische Untersuchungen der radikalischen Oxidation organischer kurzkettiger Carbonylverbindungen in wässriger Lösung (Kinetic and mechanistic investigations of the radical oxidation of organic short-chain carbonyl compounds in the aqueous phase), Faculty of Chemistry and Mineralogy of the University of Leipzig, Leipzig, 174 pp., 2012.

Schaefer, T., van Pinxteren, D., and Herrmann, H.: Multiphase chemistry of glyoxal: revised kinetics of the alkyl radical reaction with molecular oxygen and the reaction of glyoxal with OH,  $\text{NO}_3$ , and  $\text{SO}_4^-$  in aqueous solution, *Environmental Science and Technology*, 49, 343-350, 10.1021/es505860s, 2014.

Schöne, L., and Herrmann, H.: Kinetic measurements of the reactivity of hydrogen peroxide and ozone towards small atmospherically relevant aldehydes, ketones and organic acids in aqueous solutions, *Atmos. Chem. Phys.*, 14, 4503-4514, 2014.

Schuchmann, M. N., Zegota, H., and Von Sonntag, C.: Acetate peroxy radicals  $\cdot\text{O}_2\text{CH}_2\text{CO}_2^-$ : A study on the  $\gamma$ -radiolysis and pulse radiolysis of acetate in oxygenated aqueous solutions, *Z. Naturforsch.*, 40b, 215-221, 1985.

Schuchmann, M. N., and Von Sonntag, C.: The rapid hydration of the acetyl radical. A pulse radiolysis study of acetaldehyde in aqueous solution, *J. Am. Chem. Soc.*, 110, 5698-5701, 1988.

Snider, J. R., and Dawson, G. A.: Tropospheric light alcohols, carbonyls, and acetonitrile : concentrations in the southwestern united states and Henry's law data, *J. Geophys. Res.*, 90, 3797-3805, 1985.

Sørensen, P. E.: The reversible addition of water to glycolaldehyde in aqueous solution, *Acta Chem. Scand.*, 26, 1972.

Tur'yan, Y. I.: Kinetics and equilibrium of the dehydration-hydration and recombination-dissociation reactions of glyoxylic acid investigated by electrochemical methods, *Croat. Chem. Acta*, 71, 727-743, 1998.

Von Sonntag, C.: *The chemical basis of radiation biology*, Taylor & Francis, 1987.

Winkelman, J. G. M., Voorwinde, O. K., Ottens, M., Beenackers, A. A. C. M., and Janssen, L. P. B. M.: Kinetics and chemical equilibrium of the hydration of formaldehyde, *Chem. Eng. Sci.*, 57, 4067-4076, 2002.

Zellner, R., Herrmann, H., Exner, M., Jacobi, H. W., Raabe, G., and Reese, A.: Formation and reactions of oxidants in the aqueous phase, in: *Heterogeneous and liquid phase processes*, edited by: Warneck, P., 146-152, 1996.
